1 **The virulence of the *Cryptococcus neoformans* VN1a-5 lineage is highly plastic and**  
2 **associated with isolate background.**

3

4 Trieu Phan Hai<sup>1</sup>, Thanh Lam Tuan<sup>1</sup>, Duong Van Anh<sup>1</sup>, Trinh Nguyen Mai<sup>1</sup>, Lan Nguyen Phu

5 Huong<sup>2</sup>, Guy E. Thwaites<sup>1,3</sup>, Errin Johnson<sup>4</sup>, Nguyen Van Vinh Chau<sup>2</sup>, Stephen Baker<sup>5</sup>, Philip

6 M. Ashton<sup>1,3</sup>, Jeremy N. Day<sup>1,3</sup>

7

8 1. Oxford University Clinical Research Unit, Wellcome Trust Asia Africa Programme, 764 Vo

9 Van Kiet, Quan 5, Ho Chi Minh City, Vietnam

10 2. Hospital for Tropical Diseases, 764 Vo Van Kiet, Ho Chi Minh City, Viet Nam

11 3. Nuffield Department of Clinical Medicine, University of Oxford, Old Road Campus,

12 Headington, Oxford OX3 7BN UK

13 4. Sir William Dunn School of Pathology, University of Oxford, S Parks Rd, Oxford OX1 3RE,

14 United Kingdom UK

15 5. Cambridge Institute of Therapeutic immunology and Infectious Disease, Department of

16 Medicine, University of Cambridge, Cambridge, UK

17

18 **Corresponding author:**

19 J N Day

20 Oxford University Clinical Research Unit, 764 Vo Van Kiet, Quan 5, Ho Chi Minh City,

21 Vietnam

22 Email:jday@oucru.org

23 **Key words:**

24 *Cryptococcus neoformans*; Meningitis; Immunocompetent; HIV; Virulence; Pathogenesis

25

26

27 **Author contact information:**

| <b>Name</b>          | <b>Email</b>                                             |
|----------------------|----------------------------------------------------------|
| Trieu Phan Hai       | <a href="mailto:trieuph@oucru.org">trieuph@oucru.org</a> |
| Thanh Lam Tuan       | thanht.311088@gmail.com                                  |
| Duong Van Anh        | anhdv@oucru.org                                          |
| Trinh Nguyen Mai     | maitrinh473@gmail.com                                    |
| Lan Nguyen Phu Huong | bshuonglan@gmail.com                                     |
| Guy E Thwaites       | gthwaites@oucru.org                                      |
| Errin Johnson        | errin.johnson@path.ox.ac.uk                              |
| Nguyen Van Vinh Chau | chaunvv@oucru.org                                        |
| Stephen Baker        | sgb47@medschl.cam.ac.uk                                  |
| Philip M Ashton      | pashton@oucru.org                                        |
| Jeremy N Day         | jday@oucru.org                                           |

28

29

30 **Abstract**

31 *Cryptococcus neoformans* most frequently causes disease in immunocompromised patients.  
32 However, in Vietnam and east Asia, disease is frequently reported in apparently  
33 immunocompetent patients. We have previously shown that almost all such disease is due  
34 to a specific lineage of *C. neoformans* – VN1a-5. However, in HIV-infected patients, infections  
35 due to this lineage are not associated with worse outcomes. Here, we demonstrate that the  
36 VN1a-5 lineage presents different virulence phenotypes depending on its source. Isolates  
37 derived from immunocompetent patients are more virulent than those from HIV-infected  
38 patients or the environment. Moreover, the virulence phenotype is plastic – sterile culture  
39 filtrate from highly virulent VN1a-5 strains can induce increased virulence in less virulent  
40 VN1a-5 isolates, which in turn can then induce increased virulence in their low virulence  
41 states. We present evidence that this phenomenon is driven by secreted proteins associated  
42 with extra-cellular vesicles.

43

44

## 45 Introduction

46 Cryptococcal meningitis is a devastating disease due to infection with encapsulated yeasts  
47 of the *Cryptococcus* genus. The vast majority occurs in HIV-infected patients due to infection  
48 with *Cryptococcus neoformans*, and has a high mortality rate<sup>1</sup>. Disease in HIV-infected  
49 patients has been driven by the clonal expansion of a small number of well-defined lineages.  
50 These lineages are widely dispersed globally, but a single lineage predominates in most  
51 countries<sup>2</sup>. However, Vietnam is atypical and has two co-dominant circulating lineages  
52 (VN1a-5 and VN1a-4), each accounting for approximately 35-40% of cases of meningitis in  
53 HIV-infected patients<sup>2-4</sup>.

54

55 In addition to HIV-associated disease, cryptococcal meningitis is also well-described in HIV-  
56 uninfected patients in Southeast and East Asia<sup>5-9</sup>. Such patients account for approximately  
57 20% of cases at our hospital in Vietnam<sup>9</sup>; the majority of these patients are apparently  
58 immunocompetent. Outcomes are similar to those in HIV patients, with 3 month mortality  
59 rates in the order of 20-30%<sup>9</sup>. Contrary to other locations in tropical and sub-tropical  
60 areas<sup>10, 11</sup>, most infections in these patients (80%) are due to *C. neoformans*, rather than *C.*  
61 *gattii*<sup>12</sup>. We previously identified an association between the *C. neoformans* VN1a-5 lineage  
62 and disease in these apparently immunocompetent patients, it accounting for  
63 approximately 90% of meningitis due to *C. neoformans*<sup>2,3,12</sup>. Furthermore, HIV-uninfected  
64 patients with cryptococcal meningitis due to other lineages were significantly more likely to  
65 have co-morbidities associated with immune compromise<sup>12</sup>. These data suggest that VN1a-5  
66 isolates have increased pathogenic potential. Of note, we do not observe clustering of  
67 isolates within the VN1a-5 lineage according to host immune status, signifying that the  
68 entire lineage has the potential to cause disease in immunocompetent people<sup>2</sup>.

69

70 Here, we aimed to understand the pathogenic ability of isolates of the VNla-5 lineage. Using  
71 the *Galleria mellonella* infection model, we identified differences in virulence between  
72 isolates of the VNla-5 lineage of different ecological backgrounds. The most virulent isolates  
73 were from HIV-uninfected patients, which were more virulent than VNla-5 isolates from  
74 HIV-infected patients or the environment. However, we could induce increased virulence in  
75 lower virulence VNla-5 isolates via transfer of sterile culture filtrate derived from highly  
76 virulent VNla-5 isolates from immunocompetent patients. Consequently, these ‘induced’  
77 isolates could sequentially increase the virulence of other low virulence isolates, and their  
78 own ‘naïve’ self. This virulence plasticity is mediated by peptide/protein associated with  
79 extracellular vesicles and likely underlies the ability of the VNla-5 lineage to cause disease in  
80 immunocompetent people.

81

## 82 **Results**

### 83 *Assessing the virulence of C. neoformans VNla-5*

84 We exploited the *Galleria* model of infection to compare the relative virulence of 20 VNla-5  
85 clinical isolates from HIV-uninfected patients with 20 VNla-4 isolates from HIV-infected  
86 patients (Table S1). VNla-5 infected *Galleria* had a significantly increased hazard of death  
87 compared with VNla-4 infected *Galleria* (Hazard Ratio (HR) 1.4, 95% Confidence Interval  
88 (95CI) 1.2-1.6, P<0.001) (Figure 1A). After comparing the relative virulence of VNla-5 isolates  
89 according to their source we found that *Galleria* infection with isolates from  
90 immunocompetent patients was associated with a significantly increased hazard of death  
91 compared with infection with isolates from HIV-infected patients (HR 2.2, 95CI 1.6 – 3.0,  
92 P<0.001), or with isolates from the environment (HR 5.7, 95CI 3.9 – 8.4, P<0.001, Figure 1B).

93

94 Hypothesising that the difference in virulence phenotype by ecological background was a  
95 function of a previous infection experience we six-fold passaged environmental organisms  
96 through *Galleria*. The virulence phenotype of the environmental isolates remained stable  
97 over these multiple passages through *Galleria* with no change in the hazard of death  
98 between the infection with the 'naïve' environmental isolate versus infection with that  
99 isolate following passage (Figure S1).

100

101 We compared the expression of *in vitro* phenotypic characteristics associated with virulence  
102 in VNla-5 isolates depending on their source (immunocompetent patients or HIV-infected  
103 patients). We compared 15 isolates from immunocompetent patients with 15 isolates from  
104 HIV-infected patients and measured growth rates in YPD broth and pooled human  
105 cerebrospinal fluid (CSF), capsule size, extracellular urease, phospholipase, and laccase  
106 activity. There was no difference in cell diameter, melanin production, urease, or  
107 phospholipase production. Isolates from HIV-uninfected patients had moderate but  
108 significant increased growth in YPD by 48 hours at 30°C and 37°C compared with isolates  
109 from HIV-infected patients (median  $4.5 \times 10^5$  CFU/ml (Interquartile Range (IQR)  $3.6 \times 10^5$  -  $5.2$   
110  $\times 10^5$ ) and  $4 \times 10^5$  CFU/ml (IQR  $2.6 \times 10^5$  -  $5 \times 10^5$ ) for immunocompetent isolates versus  $3.3$   
111  $\times 10^5$  CFU/ml (IQR  $2.9 \times 10^5$  -  $4.5 \times 10^5$ ) and  $2.8 \times 10^5$  CFU/ml (IQR  $2.2 \times 10^5$  -  $3.8 \times 10^5$ ) for HIV  
112 derived isolates,  $P=0.004$  and  $0.002$ , respectively). The difference in the ability of isolates  
113 derived immunocompetent patients to grow at 37°C compared with 30°C did not reach  
114 statistical significance ( $P=0.058$ ); however, there was statistically significant reduction in  
115 growth of isolates from HIV-infected patients at 37°C ( $P = 0.044$ ) (Figure 2).

116

117 In contrast, isolates derived from immunocompetent patients had slower growth in *ex vivo*  
118 CSF compared with isolates derived from HIV-infected patients, with median fungal burdens  
119 of  $7 \times 10^3$  CFU/ml (IQR  $4.9 \times 10^3 - 1.0 \times 10^4$ ) versus  $1.9 \times 10^4$  CFU/ml (IQR  $6 \times 10^3 - 2.6 \times 10^4$ ) after  
120 48 hours,  $P=0.02$  (Figure 2). The isolates derived from immunocompetent patients also  
121 elaborated significantly thinner capsules (median thickness 1.3 microns, IQR 0.8 - 1.6)  
122 compared with isolates from HIV-infected patients (median 1.5 microns, IQR 1.3 – 1.95),  
123  $P<0.001$ ).

124

125 *Low virulence VN1a-5 C. neoformans isolates can be induced to become highly virulent*

126 We hypothesized that the development and/or maintenance of the increased virulence  
127 state was due to inter-yeast communication. To test this hypothesis we cultured an  
128 environmental VN1a-5 isolate of low virulence in media supplemented with sterilised culture  
129 filtrate (sCF) extracted from culture of VN1a-5 isolates with high virulence from  
130 immunocompetent patients. Virulence phenotypes were again compared in *Galleria*.  
131 Culture in media supplemented with sCF from all four organisms from immunocompetent  
132 patients resulted in increased virulence of the environmental isolates in comparison to their  
133 ‘naïve’ state; the hazard of death after induction increased between 2.2 and 2.9-fold (Figure  
134 3). This change in virulence phenotype of the induced environmental isolates was stable  
135 over multiple *Galleria* infection cycles (**Figure S2**). Conversely, culture in media  
136 supplemented with pooled sCF from HIV-associated VN1a-5 isolates had no significant effect  
137 on the virulence phenotype of environmental isolates (HR1.4, 95CI 0.8-2.3,  $P=0.2$ , ‘induced’  
138 isolate versus naïve isolate; Figure 4).

139

140 We repeated the above experiment but cultured an environmental VN1a-5 isolate in media  
141 supplemented with sCF from VN1a-4 isolates (necessarily) derived from HIV-infected  
142 patients. These conditions did not result in any significant variation in virulence. Similarly,  
143 culturing the VN1a-5 environmental isolate in media supplemented with sCF from a previous  
144 culture of the same organism, or from the H99 type strain, had no effect on virulence  
145 (Figure 4).

146

147 *Culture filtrate from an induced VN1a-5 isolate will increase virulence in its naïve isogenic self*

148 We next measured the effect of growing a 'naïve' low virulence VN1a-5 environmental  
149 isolate (LD2) in media supplemented with sCF from its previously 'induced' higher virulence  
150 self. We cultured the naïve LD2 isolate in culture medium supplemented with sCF from a  
151 highly virulent isolate derive from an immunocompetent patient (BMD761) for 48 hours.  
152 The cultured yeast cells were harvested by centrifugation, washed, and inoculated onto  
153 solid media for single colonies. We termed this isolate 'iLD2'. iLD2 was again cultured in  
154 liquid media for 48 hours and the culture filtrate harvested. The naïve LD2 isolate was  
155 cultured in media supplemented with the sCF from iLD2 for 48 hours. We termed the  
156 resulting isolate 'iLD2-induced LD2'. The virulence phenotypes of the isolates from each  
157 experiment in the *Galleria* model – i.e. 'LD2', 'iLD2', 'iLD2-induced LD2' and BMD761 were  
158 compared. This experiment demonstrated that, like sCF from BMD761, sCF from iLD2 was  
159 itself able to induce an increased state of virulence in its naïve self (nLD2): HR 2.8 (1.7-4.4),  
160  $P < 0.001$  (Figure 5).

161

162



163 *Virulence induction is associated with known virulence markers*

164 We assessed the effect of culture filtrate induction on known virulence-associated  
165 phenotypes in *Cryptococcus* by comparing the environmental isolated LD2 before (naïve)  
166 and after induction (induced). There was no change in thermotolerance or melanization.  
167 However, the induced LD2 had superior growth after 48 hours incubation in *ex vivo* CSF  
168 compared with its naïve self (median  $5.9 \times 10^4$  CFU/ml, IQR  $3.6 \times 10^4 - 7.6 \times 10^4$  vs  $3.5 \times 10^4$   
169 CFU/ml, IQR  $2.3 - 5.7 \times 10^4$ ,  $P=0.02$ , Figure S3a). Similarly, the 48 hour fungal burden in  
170 hemolymph of *Galleria* infected with the induced isolate was significantly higher than in  
171 hemolymph when infected with its naïve self (median fungal burden  $9.6 \times 10^6$  CFU/g body  
172 weight (inter-quartile range  $6.9 \times 10^6 - 1.4 \times 10^7$ ) versus  $5.3 \times 10^6$  CFU/g body weight (IQR  $4.0$   
173  $\times 10^6 - 6.7 \times 10^6$ ,  $P=0.025$ ), Figure S3b). Induced LD2 isolates elaborated significantly thinner  
174 capsules compared with the naïve self both when grown *in vitro* (median capsule width  $4.5$   
175  $\mu\text{m}$ , IQR  $3.3-6.4$  versus  $7.2 \mu\text{m}$ , IQR  $4.5 - 9.8$ ,  $P<0.001$ , induced versus naïve respectively)  
176 and when recovered from larval hemolymph ( $P=0.03$ , see Figure S4). Both induced LD2 and  
177 naïve LD2 had significantly thinner capsules than the highly virulent immunocompetent  
178 associated organism BMD761 ( $P<0.001$  and  $P=0.03$  respectively).

179

180 *The induction phenomenon is protein mediated via extracellular vesicles*

181 The induction effect of sCF from hypervirulent BMD761 on the naïve environmental  
182 organism LD2 was maintained after storage at  $-20^\circ\text{C}$  for 28 days. The same observation was  
183 made for sCF treated with RNase or DNase. However, boiling sCF, or treating sCF with  
184 Proteinase K, abolished the induction effect (Figure 6). We further hypothesized that the  
185 induction phenomenon was associated with extracellular vesicles (EVs), which have been  
186 implicated in the pathogenic potential of *Cryptococcus neoformans* and the related

187 organism *Cryptococcus gattii*<sup>13-15</sup>. Consequently, we added bovine serum albumin (BSA),  
188 which disrupts EV function, to sCF from BMD761 and measured the induction effect on  
189 LD2<sup>13,16</sup>. Adding BSA resulted in the loss of the induction effect with no increase in the  
190 virulence of the recipient isolate versus its naïve self (HR 0.8; 95CI 0.5, 1.3, P=0.32, Figure  
191 S5).

192

193 We then generated EV-free supernatant and EV-containing pellet fractions (as shown by  
194 electron microscopy) from both BMD761 derived sCF and previously induced LD2 sCF  
195 (Figure 8). Incubation of naïve LD2 in media supplemented with supernatants did not result  
196 in induction of increased virulence (BMD 761 supernatant: HR 1.2, 95CI 0.8, 1.5; P=0.3,  
197 Figure 7B and iLD2 supernatant: HR 1.2, 95CI 0.9, 1.6; P=0.1 see Figure 7D). Conversely,  
198 when a naïve LD2 was grown in media supplemented with the EV-containing pellets there  
199 was induction of increased virulence (BMD 761 pellet: HR 1.8, 95CI 1.4, 2.4; P<0.001, Figure  
200 7A and iLD2 pellet: HR 2.1, 95CI 1.6, 2.7; P<0.001, see Figure 7C).

201

202 *Induction is associated with the expression of genes encoding virulence factors and*  
203 *hypothetical proteins*

204 We used RNA-seq to investigate the transcriptional basis of the observed phenotypic  
205 change. High quality RNA sequences were generated from four organisms with a confirmed  
206 phenotype: an environmental VN1a-5 (low virulence and termed naïve LD2 (nLD2)), a clinical  
207 VN1a-5 from an HIV-uninfected patient (BMD761), an environmental VN1a-5 in a state of  
208 increased virulence after growth in media supplemented with sCF from clinical VN1a-5  
209 (induced LD2: iLD2) and the naïve environmental VN1a-5 isolate (nLD2) grown in media

210 supplemented with its own sCF from a previous culture of its naïve self (self-induced LD2:  
211 siLD2) (Table S2).

212

213 The majority of transcriptome replicates clustered by their sample type on a PCA plot of  
214 read counts per gene (Figure S6). There was a notable difference in global gene expression  
215 between BMD761 and nLD2. The overall transcriptional profile of iLD2 was closer to that of  
216 BMD761 after induction. The 'self-induced' LD2 also differed in the transcriptional profile  
217 from the naïve LD2, was distinct from iLD2, and did not converge with the expression profile  
218 of BMD761.

219

220 We next performed differential gene expression analysis to identify genes that were  
221 significantly (Wald test, Benjamini-Hochberg adjusted P value  $<0.05$ ,  $\log_2$  fold change  $\geq 1$   
222 and  $\leq -1$ ) up or down regulated. We filtered 784 differentially expressed genes between  
223 BMD761 and naïve LD2; after induction with BMD761 sCF; 244 genes were differentially  
224 expressed between BMD761 and induced-LD2 (Figure 9). This contrasts with the large  
225 number of differences between these 2 isolates and LD2 in the other states (naïve or self-  
226 induced), where we found there were  $>1500$  DEGs (Figure 9).

227

228 We aimed to identify upregulated genes in both BMD761 and induced LD2 compared with  
229 naïve LD2 that may explain the phenotypic difference. Focussing on genes which were  
230 experimentally known to be associated with virulence<sup>17</sup>, we identified 17 up-regulated  
231 virulence genes in both BMD761 and induced LD2 relative to naïve LD2 (Supplementary  
232 Table S3). Specifically, we found that QSP1, which encodes a secreted peptide that has  
233 previously been implicated in quorum sensing and the upregulation of virulence of *C.*

234 *neoformans*, was significantly downregulated in both the highly virulent BMD761 isolate and  
235 the induced environmental isolate versus its naïve self (Supplementary Table S3)<sup>18</sup>.

236

## 237 **Discussion**

238 A number of lineages of *Cryptococcus neoformans* cause meningitis in humans in Vietnam,  
239 but the vast majority of cases are due to either VN1a-4 or VN1a-5<sup>2</sup>. We have previously  
240 shown that the VN1a-5 lineage is strongly associated with disease in apparently  
241 immunocompetent patients<sup>2,3</sup>. Both VN1a-5 and VN1a-4 frequently affect our (severely  
242 immunosuppressed) HIV-infected patients<sup>2,3</sup>. VN1a-4 rarely causes disease in HIV-uninfected  
243 patients, and when it does, the patients are significantly more likely to have underlying  
244 diseases associated with immunosuppression<sup>9</sup>. Despite this difference in ability to infect  
245 hosts of different immune competencies, mortality rates are no different in HIV-infected  
246 patients whether they are infected with VN1a-4 or VN1a-5<sup>3</sup>. Our work here goes some way  
247 towards explaining these observations. We have found that the VN1a-5 lineage displays  
248 significant variability in virulence phenotype in the *Galleria* model of infection, and that this  
249 is associated with the particular isolate's ecological background – isolates from  
250 immunocompetent patients are more virulent than those from HIV-infected individuals or  
251 those recovered from the environment. The VN1a-5 isolates derived from  
252 immunocompetent patients are also significantly more virulent than VN1a-4 isolates,  
253 necessarily derived from HIV-infected patients.

254

255 The differences in virulence phenotype of the VN1a-5 isolates are not explained by a specific  
256 within-lineage substructure - virulent isolates from immunocompetent patients do not  
257 cluster within, but are distributed throughout, the VN1a-5 phylogeny<sup>2</sup>. This suggests that any

258 isolate of the VN1a-5 lineage should have the capacity to express a highly virulent  
259 phenotype, and therefore infect immunocompetent patients. Consistent with this, we found  
260 that the VN1a-5 virulence phenotype is highly plastic – less virulent isolates, derived from  
261 the environment, can be induced into a more virulent state by growing them in culture  
262 media that has been supplemented with sCF from highly virulent isolates, derived from  
263 immunocompetent patients. While we found HIV derived VN1a-5 isolates were somewhat  
264 more virulent than the environment-derived isolates, their sCF lacked this capacity and could  
265 not induce increased virulence. The induction effect was also limited to sCF derived from  
266 the VN1a-5 lineage – sCF from the VN1a-4 lineage, or from the VN1b H99 type strain, did not  
267 have the induction property. Therefore, we hypothesize that the induction effect seen with  
268 culture filtrate from immunocompetent patient-derived VN1a-5, and the virulence plasticity  
269 of the lineage, are intimately associated with the ability of the lineage to cause disease in  
270 the immunocompetent host.

271

272 We found the increased virulence of VN1a-5 derived from immunocompetent patients was  
273 associated with differences in *in vitro* virulence phenotypes compared with isolates from  
274 HIV-infected patients, although the relationship was not simple. Isolates from  
275 immunocompetent patients had faster rates of growth at 30 and 37°C, but had slower  
276 growth in *ex vivo* cerebrospinal fluid and expressed thinner capsules. Induction of the higher  
277 virulence state in the environmental isolate LD2 was also associated with increased fungal  
278 burdens in *Galleria*, and expression of thinner capsules both *in vitro* and in the *Galleria*  
279 model. However, the induced LD2 isolate grew more rapidly in *ex vivo* CSF compared with  
280 its naïve self. It is not clear why the changes in *in vitro* phenotypes on induction were not  
281 entirely consistent with our findings when comparing isolates by source. It may reflect the

282 fact that these measures of virulence are largely validated in relation to the ability to cause  
283 disease in humans irrespective of immune background, i.e. including those with HIV  
284 infection. Or, it may be that the induction phenomenon we have identified here is only a  
285 part of the mechanism that is associated with disease in immunocompetent humans.  
286 However, our transcriptional data suggest that the change in virulence we are measuring in  
287 *Galleria* is real and relevant, because i) it is associated with increased expression of a  
288 number of virulence associated genes and ii) we saw a significant and remarkable  
289 convergence in gene expression between the highly virulent BMD761 isolate and the  
290 induced environmental isolate LD2.

291

292 The induction phenomenon we see is robust and repeatable. We do not believe it is an  
293 artefact of 'carry-over' of virulent organism from the sCF donor isolate, because we used  
294 0.45 micron filters, which should exclude any donor cells, and every culture filtrate was  
295 tested for sterility by culture. Furthermore, the induced state is stable following purification  
296 by culture on solid media. We can be certain that the convergence of the transcriptomic  
297 data from BMD761 and iLD2 is not confounded by contamination because we identified  
298 SNPs unique to each isolate within the context of nearly 900 *C. neoformans* genomes<sup>2</sup>, and  
299 verified the identity of the strains in the RNA-seq data using these markers. Similarly we also  
300 do not believe that the effect on virulence in *Galleria* is due to 'carryover' of some agent (eg  
301 extra-cellular vesicles) from the donor isolate sCF into *Galleria*, because induced isolates  
302 retain their increased virulence following purification on solid media.

303

304 The induction effect appears to include a protein or small peptide component, since the  
305 inducing effect of sCF is lost with both boiling and protease treatment. A secreted peptide –

306 QSP1 – has previously been shown to be involved in quorum-sensing and virulence  
307 regulation of *C. neoformans*<sup>18</sup>. Interestingly, we found that expression of this gene is down-  
308 regulated when the low virulence environmental strain is induced into the high virulence  
309 state and thus it is unlikely that this gene explains the phenomenon we observed.  
310  
311 Our data also suggest that the induction effect is associated with extra-cellular vesicles – the  
312 addition of albumin, which disrupts *Cryptococcus* vesicles, to sCF inhibited virulence  
313 induction<sup>16</sup>. We used an ultracentrifugation protocol<sup>13</sup> to isolate EVs and showed that the  
314 induction effect was maintained in the EV containing pellet, and lost in the EV-free  
315 supernatant. We confirmed the presence and absence of EVs in the pellet and supernatant  
316 respectively with transmission electron microscopy. The populations and compositions of  
317 EVs secreted by eukaryotic cells are complex. In addition to proteins they can contain small  
318 nucleic acids<sup>13</sup>. While we found no effect of nuclease treatment on the property of sCF, it is  
319 possible that we may have missed an effect because any small nucleic acids may have been  
320 protected within vesicles.  
321  
322 A striking feature of the induction effect is the stability of the resulting phenotype, and the  
323 transmissibility of the phenomenon. One possible explanation is that the effect we are  
324 observing is an infection event by a mycovirus. To investigate this possibility we  
325 interrogated all unmapped reads from our whole genome and transcriptome sequence data  
326 using a metagenomic platform (<http://taxonomer.com>, data not shown). We found no  
327 evidence of viral infection. A further possibility is that the effect is prion mediated – an EV-  
328 associated prion (Sup35p) has been implicated in cell-to-cell communication in  
329 *Saccharomyces cerevisiae*, although the effect is not well-conserved across species<sup>19,20</sup>.

330 However, the fact that the effect of sCF we observed was heat labile suggests a prion-driven  
331 mechanism is unlikely.

332

333 On balance, we believe the phenomenon we have described is mediated through EVs  
334 associated with one or more peptides/proteins. Small nucleic acids may also be involved. An  
335 EV-dependent mechanism is plausible - EV production has been demonstrated for a number  
336 of fungal pathogens, including *Cryptococcus*<sup>14,15,21-23</sup>. A specific role in the pathogenicity of  
337 *C.neoformans* was first postulated in 2008<sup>22</sup>, and EVs have been shown to contain virulence-  
338 associated factors including capsular components and laccase<sup>14</sup>. In addition to proteins, EVs  
339 are also associated with small DNAs and RNAs which could influence virulence<sup>13,23-25</sup>. More  
340 recently, EVs have been shown to mediate the virulence of an outbreak strain of the related  
341 species *C.gattii*<sup>13</sup>. The EV-mediated effect was dose-dependent, manifested as increased  
342 growth, and required both EV-associated protein and RNA, providing strong evidence of EV  
343 uptake enabling inter-yeast communication<sup>13</sup>. The phenomenon differed from our  
344 observations in that it was seen in macrophage culture, and onward transmissibility of the  
345 phenotype was not reported<sup>13</sup>.

346

347 Where and when the virulence induction phenomenon occurs in relation to human disease  
348 is unclear. It may be a rare event that occurs somewhere in the environment, perhaps as a  
349 result of interaction with other micro-organisms, or a consequence of animal infection. If  
350 this is the case, we would on occasion expect to see such inducing, high virulence isolates in  
351 HIV-infected patients. To confirm this we would need to characterise large numbers of  
352 isolates from HIV-infected patients. Alternatively, induction might occur in humans



353 themselves, although if so this is probably not driven by innate immunity, since the  
354 virulence phenotype was extremely stable in *Galleria*<sup>26-29</sup>.  
355  
356 A great challenge in treating HIV-uninfected patients with cryptococcal meningitis is  
357 knowing when it is safe to stop antifungal therapy. Cure may take many months of  
358 treatment, and patients may even require life-long antifungal suppressive therapy<sup>30</sup>. This  
359 contrasts with HIV-infected patients, who have a modifiable immune pathology - once  
360 antiretroviral therapy has allowed immune recovery antifungal treatment can be stopped  
361 safely<sup>30</sup>. Inter-yeast signalling systems, associated specifically with changes in virulence, are  
362 potential therapeutic targets. Disrupting such systems might allow shortened treatment  
363 courses or even cure in immunocompetent patients. However, they are only relevant if  
364 active in human disease. Currently, it is extremely difficult to obtain sufficient volumes of  
365 clinical samples to reliably test hypotheses concerning pathogenesis (generated from  
366 laboratory observations) at the site of human disease<sup>31</sup>. However, the recent development  
367 of a novel cerebrospinal fluid filtration technology – neurapheresis – may revolutionise this.  
368 Neurapheresis, developed to treat hemorrhagic stroke, can efficiently remove large  
369 amounts of pathogen biomass from the cerebrospinal fluid of rabbits experimentally  
370 infected with *Cryptococcus*<sup>32-34</sup>. Such a system, itself a potential treatment for human  
371 cryptococcal disease, could allow confirmation that the phenomenon we describe here is  
372 active in human disease.

373

## 374 **Conclusion**

375 The virulence phenotype of *Cryptococcus neoformans* VN1a-5 in the *Galleria* infection model  
376 is associated with the isolate source. Isolates from immunocompetent patients are the most

377 virulent; those from the environment the least. The virulence phenotype is highly plastic  
378 and moderated by inter-yeast signalling through the secretion of proteins or peptides  
379 associated with extracellular vesicles. Induction of virulence is accompanied by  
380 transcriptional re-modelling and convergence of gene expression between the induced and  
381 inducer isolates. The induction phenomenon is VN1a-5 specific, and likely key in the lineage's  
382 ability to cause disease in the immunocompetent host. Better understanding this  
383 mechanism may reveal novel therapeutic targets.

384

### 385 **Funding**

386 Funded by a Wellcome Trust Intermediate Fellowship to JND Grant number: WT097147MA

387

### 388 **Acknowledgements**

389 Electron microscopy was performed at the Dunn School EM Facility at the University of  
390 Oxford.

391

### 392 **Methods**

#### 393 **Isolates**

394 Clinical isolates were derived from Vietnamese patients with cryptococcal meningitis who  
395 had been enrolled into descriptive and randomised intervention studies performed by our  
396 institute in collaboration with the Hospital for Tropical Diseases, Ho Chi Minh City<sup>9,35,36</sup>. All  
397 isolates were from cerebrospinal fluid obtained at the point of diagnosis and/or study entry,  
398 and stored on Microbank beads at -80°C prior to revival on Sabouraud dextrose agar.

399 Informed consent was obtained from all participants; all studies received ethical approval  
400 through the Oxford Tropical Ethics Committee, The Hospital for Tropical Diseases, and The

401 Ministry of Health of Vietnam. All isolates have been previously sequenced and the data are  
402 publically available<sup>2</sup>. Isolates of the lineage and human immune phenotype of interest (HIV-  
403 infected or not) were randomly selected from the isolate database for subsequent  
404 experiments. Environmental isolates were obtained via randomised sampling of air, soil and  
405 tree bark in urban and rural areas within and around Ho Chi Minh City. All strains used were  
406 mating type alpha.

407

#### 408 ***In vitro* phenotyping**

##### 409 **Temperature – dependent growth**

410 Growth at high temperature and in *ex vivo* human CSF were tested as previously described  
411 with modifications for quantitative assessment<sup>37</sup>. *Cryptococcus spp* were cultured on  
412 Sabouraud agar for 2 days at 30°C. Inocula were made from single colonies and adjusted to  
413 10<sup>8</sup> cells/ml, then serially 10-fold diluted and spotted in duplicate onto YPD agar in 5µl  
414 aliquots. Incubation was at 30°C or 37°C for 48 hours. After 48 hours, the number of colony  
415 forming units (CFU) was counted and expressed as CFU/ml.

416

##### 417 **Capsule production**

418 Capsule thickness was assessed through growth on Dulbecco Modified Eagle Medium  
419 (DMEM) [supplemented with 4.5g/L glucose, L-glutamine, sodium pyruvate], NaHCO<sub>3</sub>  
420 250mM, NaMOPS 1M, Neomycin 200mg/ml, Cefotaxime 100 mg/ml<sup>38</sup>. Plates were  
421 incubated at 37°C in 5 % CO<sub>2</sub> for 5 days. A suspension from a single colony was made in  
422 India ink visualized at 100X magnification using light microscopy (CX41, Olympus, Japan).  
423 Images were captured using a built-in DP71 camera (Olympus, Japan) and visualised using  
424 ImageJ (<https://imagej.nih.gov/ij/index.html>). Capsular thickness was calculated by

425 subtracting yeast cell body diameter from the whole cell diameter. Ten individual  
426 microscopic yeast cells were assessed for each isolate.

427

#### 428 **Laccase activity**

429 Laccase activity was assessed by adding an inoculum of  $2 \times 10^4$  cells into 96 microwell plates  
430 containing L-DOPA medium (0.1% glucose anhydrous, 0.1% L-asparagine, 0.3%  $\text{KH}_2\text{PO}_4$ ,  
431 0.025%  $\text{MgSO}_4 \cdot 7\text{H}_2\text{O}$ , and 0.01% L-DOPA, pH 5.56) with incubation for 16 hours at  $37^\circ\text{C}$   
432 followed by 48 hours at  $25^\circ\text{C}$  with shaking at 800 rpm to induce melanin production. After  
433 incubation, the supernatants were harvested by centrifugation (4,000 g for 5 minutes) and  
434 the amount of pigment produced determined spectrophotometrically at a wavelength of  
435 475-nm. Absorbance was converted into laccase units (U) by a factor of  $0.001 \text{ OD} = 1 \text{ U}^{39}$ . A  
436 Two biological replicates were performed for each isolate.

437

#### 438 **Urease and phospholipase production**

439 Urease production was confirmed by spotting  $10 \mu\text{l}$  of a  $10^6$  cells/mL cell suspension onto  
440 Christensen's agar with incubation at  $30^\circ\text{C}$ . *Cryptococcus neoformans* H99 type strain and  
441 *Candida parapsilosis* ATCC 22019 were used as positive and negative controls. Cultures were  
442 observed daily for the characteristic pink discoloration.

443 Extracellular phospholipase activity was confirmed on egg yolk medium as previously  
444 described, with minor modifications again using a  $5 \mu\text{l}$  aliquot of *C. neoformans* yeast  
445 suspension ( $10^6$  cells/ml) with incubation at  $30^\circ\text{C}$  for 72 hours<sup>40</sup>. The diameter of the  
446 precipitation zone (D) formed around a colony in relation to the diameter of the respective  
447 colony itself (d) was recorded for 5 selected colonies of each isolate (N=1450 total). The D/d  
448 ratio for each isolate was calculated. H99 was included for reference in each experimental

449 batch. The final result for each isolate was expressed as the ratio D/d ratio. Type strain H99  
450 was used as a quality control.

451

#### 452 **Survival in *ex vivo* cerebrospinal fluid**

453 CSF was prepared by pooling and filtering (Millipore 0.45 micron membranes, Merck ) CSF  
454 samples taken prior to antifungal therapy from HIV-infected patients participating in clinical  
455 trials. CSF was stored at -80°C prior to use. An inoculum of 10<sup>6</sup> cells/mL of each isolate of  
456 interest was prepared using a Cellometer X2 (Nexcelom) cell counter. 10 uL of inoculum was  
457 added to 90 uL of CSF and PBS followed by incubation at 30°C for 3 days. After 72 hours the  
458 resulting culture was serially tenfold diluted, spotted onto Sabouraud plates and incubated  
459 at 30°C for 3 days for quantification. Tested strains were inoculated alongside H99 and the  
460 ΔENA1 negative control (which lacks a cation-ATPase-transporter resulting in decreased  
461 viability in human CSF and macrophages, strain provided by the Perfect Lab, Duke  
462 University)<sup>37</sup>. Two biological replicates were performed per isolate.

463

#### 464 ***Galleria* infection model**

465 Late instar isogenic wild type *Galleria mellonella* larvae (30 days from oviposition of the  
466 adult moth) were sourced from U U Animal, (Ho Chi Minh city, Vietnam). All larvae were  
467 kept at 16°C in bran in the dark. Larvae for experimentation were selected according to the  
468 following criteria: weight 250-300 mg, healthy colour (beige). Yeasts were revived from  
469 frozen stock (Microbank Beads) on SDA plates for 72 hours. Single colonies were picked and  
470 cultured in YPD broth for 24 to 48 hours in a shaking incubator (SI-300, Jeio Tech), at 150  
471 rpm at 30°C until the concentration of cells was at least 10<sup>8</sup> cells/mL. The pellet was  
472 collected with centrifuge at 8000 rpm in 1 minute and subsequently washed twice with PBS.

473 The cell suspension was adjusted to a density of  $10^8$  cells/mL using a Cellometer X2  
474 (Nexcelom Bioscience, USA). Ten  $\mu$ L of inoculum ( $10^6$  cells/larva) were used for injection per  
475 larva. All inocula were relabeled by an independent person such that the operator/assessor  
476 was blind to the nature of the inoculum used in each batch of larvae (i.e. the survival  
477 experiments were blinded). Larvae were inoculated through injection using a sterile  
478 Hamilton syringe into the most caudal left pro-leg. 15-20 larvae were infected per  
479 cryptococcal isolate. Every survival experiment was internally contemporaneously  
480 controlled using larvae of the same batch, a negative control (PBS) (physical injury and  
481 sterility, data not show in survival plots), and uninjected larvae and the 2 or more  
482 experimental arms of interest. Infected larvae were incubated at 37°C for ten days and  
483 checked daily for mortality using physical stimulation with forceps.

484

#### 485 **Culture Filtrate preparation**

486 All isolates were grown in 7.5 ml YPD broth at 30°C with shaking for 48 hours followed by  
487 centrifugation at 8000 rpm for 1 minute. The resulting supernatant was filtered using a  
488 Millipore membrane filter 0.45  $\mu$ m (Merck), and checked for sterility by plating onto  
489 Sabouraud's agar and into BHI broth with incubation at 30°C for seven days.

490

#### 491 **Induction experiments**

492 2.5 mls of the culture filtrate of interest was added to 5mls of sterile YPD broth (total  
493 volume 7.5mls). A single purified colony of the isolate of interest was added to the resulting  
494 culture medium and incubated for 48 hours with shaking (150rpm) at 30°C. Cells were  
495 separated by centrifugation (1 minute at 8000 rpm), washed twice with PBS and pellet  
496 spread on Sabouraud agar plate for single colony purification. Single colony was then

497 inoculated into YPD broth, and incubated with shaking for 48 hours for inoculum  
498 preparation.

499

#### 500 **Confirmation of virulence phenotype stability in *Galleria***

501 Yeast was recovered from *Galleria* hemolymph, cultured for purity on SDA, recultured in  
502 YPD and reinoculated into *Galleria* as described 6 fold. Similarly purified culture derived  
503 from hemolymph was repeatedly subcultured on solid media, frozen on Microbank beads,  
504 revived, and re-inoculated into the *Galleria* model.

505

#### 506 **Quantification of fungal burden in larvae**

507 Larvae infected with the strains of interest (5 dead larvae/biological replicate) were  
508 collected at the point of death and gently squeezed to obtain 1 gram of hemolymph and fat  
509 body using a sterile knife. Glass beads (3mm) and 1 mL of sterile water were added for  
510 homogenization at 30Hz for 10 minutes (TissueLyser II, Qiagen). Homogenates were diluted  
511 with PBS and inoculated onto SAB plates and incubated for 3 days at 30°C. The number of  
512 colonies were counted to calculate the CFU/gram/larvae.

513

#### 514 **Capsule size measurement from *Galleria***

515 Following infection with  $10^6$  cells, larvae were sacrificed 48 hours post-infection and  
516 hemolymph extracted as above. Hemolymph was stained with India ink to visualise capsule  
517 using light microscopy (at 1000X magnification) with an Olympus DP71 digital camera  
518 (Olympus, Japan) and the proprietary Image-J software.

519

520

## 521 **Treatment of culture filtrate with freezing, heat, protease, and nuclease**

522 To check the stability of culture filtrate exposed to prolonged frozen storage, the culture  
523 filtrate of BMD761 was kept at -20 °C for 33 days. The filtrate was brought to room  
524 temperature prior to induction experiments. To denature protein by heat, filtrate of  
525 BMD761 was boiled at 97 °C for 2 minutes. To denature protein chemically, filtrate was  
526 incubated with Proteinase K (Sigma-Aldrich, UK) at a concentration of 100 µg/mL in the  
527 presence of 30 mM Tris.HCl (pH=8) and 5 mM CaCl<sub>2</sub> at 37 °C for 1.5 hours. To degrade DNA,  
528 28 µL DNase I (Ambion, ThermoFisher, UK) was added to 700 µL DNase I buffer and 7 mL  
529 filtrate for 1 hour at 37°C. To remove RNA, 2.5 mL filtrate was incubated with 50 µL RNase  
530 cocktail of RNase A and RNase T1 (Ambion, ThermoFisher Scientific,UK) for 1 hour at 37°C.

531

## 532 **Confirmation of digestion of protein and nucleic acid in filtrate**

533 Protein digestion was confirmed by running treated and untreated culture filtrate on  
534 precast polyacrylamide gel 4-20 % (Mini-PROTEAN® TGX Stain-Free™ Precast Gels, BIO-RAD)  
535 at 200V for 40 mins. Precision Plus Protein Dual Xtra Standards (BIO-RAD) were loaded  
536 alongside samples, including a proteinase K treated ladder.  
537 Samples treated with nuclease were confirmed by loading in agarose gel 1.5 % followed by  
538 electrophoresis for 60 mins at 100V, with 100bp DNA ladder.

539

## 540 **Extracellular vesicle preparation**

541 Isolates for experimentation were grown to stationary phase in 500ml of YPD broth at 30°C  
542 with shaking for 48 hours prior to transfer to 200mL centrifugation vessels. These were spun  
543 at 15,000g for 10 minutes at 4°C. Supernatant was decanted and centrifugation repeated for  
544 a further 10 minutes, then filtered through 0.45µm filter membranes. The filtrate was then



545 concentrated using Amicon 100kDa ultrafiltration columns with centrifugation at 5000g for  
546 15 minutes at 4°C. The EV containing retentate, was then ultracentrifuged at 150,000g at  
547 4°C for 1 hour to provide EV containing pellet and EV-free supernatant.

548

#### 549 **Electron Microscopy**

550 Pellet and supernatant resulting from ultracentrifugation were fixed in 2%  
551 paraformaldehyde (PFA) in 0.1M sodium phosphate buffer at room temperature for 30  
552 minutes. Samples were stored at 4 °C for up to 3 days before negative staining for  
553 Transmission Electron Microscopy (TEM). For negative staining, 10 µl of sample was applied  
554 to a freshly glow discharged carbon filmed 300 mesh Cu grid for 2 mins, blotted and stained  
555 with 2% uranyl acetate for 10 sec, then blotted and air dried. Grids were imaged in a Tecnai  
556 12 TEM (Thermo Fisher) operated at 120 kV using a Gatan OneView camera.

557

#### 558 **Preparation of inducing broth using ultracentrifugation product**

559 Inducing broth consisted of 50uL ultracentrifuged product (either pellet or supernatant  
560 fraction) added to fresh sterile YPD to achieve a final volume of 7.5 mL. A 100uL volume was  
561 taken for culture as a test of sterility. Naive strains (a single colony each) were then  
562 inoculated into inducing broth and incubated for 48 hours with shaking at 30°C. Yeast were  
563 harvested in the normal manner via centrifugation 8000 rpm and washed twice with PBS  
564 prior to subculture on solid agar. Inoculum for larva infection ( $10^8$  cells/mL) were prepared  
565 in PBS using a Nexelom cell counter; 10 uL ( $10^6$  cells) were injected into the larvae.  
566 Inoculum densities were checked through serial dilution and culture.

567

568

569 **RNAseq**

570 Three replicates of each strain were cultured in YPD broth for 96 hours at 30°C to determine  
571 log phase for RNA extraction. An inoculum of  $10^6$  cells was grown in 7.5 mL of YPD broth by  
572 agitating (200 rpm). At interval time point post-inoculation (0, 6, 20, 24, 30, 44, 54, 68, 72  
573 and 96 hours), an aliquot of 50  $\mu$ L was taken for quantification by plating in Sabouraud agar  
574 plates. These plates were exposed to incubation at 30°C for 48 hours. Growth curves were  
575 plotted using ggplot package and R version 3.4.0 software (R Foundation for Statistical  
576 Computing, Vienna, Austria). Growth rates were determined using the formula growth  
577 rate= $(\log_{10}N_t - \log_{10}N_0) * 2.303 / (t - t_0)$ , where N indicates cell concentration at a particular time  
578 point; and t indicates the time point).

579 For transcriptional experiments, single colonies of each isolate of interest were revived from  
580 beads (Microbank, UK) stored at -80°C. Revived isolates (approximately  $10^6$  cells, counted  
581 using a Cellometer) were grown in 7.5 ml of YPD broth by agitating for 18 hours at 30°C to  
582 reach mid-log phase. RNA was harvested using the RiboPure™-Yeast RNA Isolation Kit  
583 (Ambion, USA) according to the manufacturer's instructions. Extracted RNA samples were  
584 subjected to quality control using an Agilent 2100 Bioanalyzer (Agilent, USA). The integrity  
585 of total RNA was estimated using the RIN (RNA Integrity Number), which ranges from 1 to  
586 10, with 1 being the most degraded. Samples with RIN greater than 7 qualified for RNA-Seq.  
587 6 biological replicates were prepared of every experimental condition. RNA was eluted in  
588 isopropanol and shipped at room temperature to Macrogen (Seoul, Korea) for library  
589 preparation and sequencing.

590 Paired-end RNA-Seq libraries were constructed using the TruSeq stranded mRNA  
591 preparation kit (Illumina, USA). Resulting cDNAs were ligated with sequencing adaptors and

592 sequenced using the Illumina HiSeq 2000 platform, generating ~11.2 million reads of 150 bp  
593 per sample, resulting in an estimated 177-fold coverage.

594

### 595 **RNA sequencing analysis**

596 Raw reads were checked for quality using FastQC

597 (<https://www.bioinformatics.babraham.ac.uk/projects/fastqc/>). Adapters were removed

598 using scythe (<https://github.com/vsbuffalo/scythe>). The resulting reads were then further

599 checked based on Phred score and read length in order to trim low quality regions using

600 Trimmomatic (<http://www.usadellab.org/cms/?page=trimmomatic>). Sequenced reads were

601 aligned with the *C. neoformans* var. *grubii* H99 reference genome using HISAT2

602 (<https://ccb.jhu.edu/software/hisat2/index.shtml>). SAM (Sequences Alignment Map) files,

603 output of read alignment, were converted to BAM (Binary Alignment Map) files using

604 SAMtools (<http://www.htslib.org>). Finally featureCounts was used to count reads assigned

605 to genomic features (genes, exons, chromosome locations) on the reference genome<sup>41</sup>. The

606 output table of raw counts per gene for each sample was imported for gene expression

607 analysis using DESeq<sup>42</sup>. Library size differences were normalized internally<sup>43</sup>.

608

### 609 **Metagenomic analysis**

610 Taxonomer, a metagenomics-based pathogen detection tool (available at

611 <http://taxonomer.com>), was used to profile unmapped mRNA expression reads and

612 unmapped DNA from (previous) genome sequencing from the *Cryptococcus* isolates. The

613 web-based interface was used to visualize the summary of taxonomic composition and read

614 abundance.

615

616 **Statistical data analysis**

617 All statistical analyses were done using R software R version 3.4.2<sup>44</sup>. Kaplan-Meyer survival  
618 curves were plotted using ggplot2 and survminer package<sup>45,46</sup>. The Log-rank test was used to  
619 compare differences in survival. Hazard Ratios were estimated using the Cox proportional-  
620 hazards model. The Wilcoxon rank sum test was used to compare fungal burdens between  
621 isolates. Capsule size was compared using the Kruskal-Wallis test with P values adjusted for  
622 multiple comparisons with the Benjamini-Hochberg method.

623

624 **Figures**

625

626 **1. Figure 1**

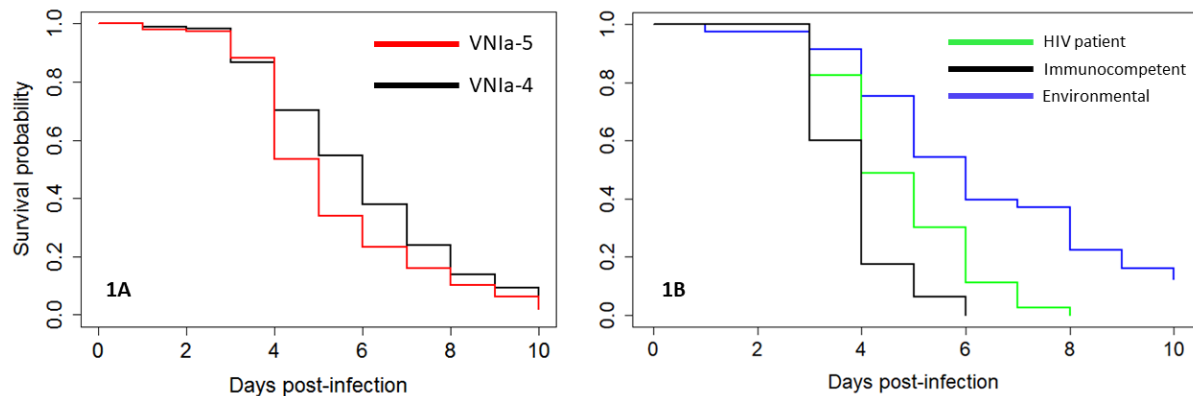

627

628

629 **Figure 1A: Survival curves of *Galleria mellonella* infected with human cerebrospinal fluid derived**  
630 **isolates of *Cryptococcus neoformans* of lineage VNla-5 (derived from immunocompetent patients)**  
631 **or lineage VNla-4 (from HIV-infected patients). N = 600 (20 isolates of each lineage, 15 larvae**  
632 **infected with each isolate, Hazard Ratio (95% Confidence interval): HR 1.4, 95CI 1.2,1.6; P<0.001**  
633 **VNla-5 versus VNla-4).**

634 **Figure 1B: Survival curves of *G. mellonella* infected with *C. neoformans* lineage VNla-5 isolates**  
635 **derived from immunocompetent patients (black line), HIV patients (green line), or the**  
636 **environment (blue line). 2 isolates of each source, 40 larvae per isolate. Hazard ratios and 95%CI for**  
637 **death: HIV derived vs environmental: 2.6, 95CI 1.8, 3.7; P< 0.001; immunocompetent derived versus**  
638 **environmental: 5.7; 95CI 3.9, 8.4; P< 0.001; Immunocompetent versus HIV derived: 1.7; 95CI 1.3 –**  
639 **2.4, P<0.001. N=80 per arm.**

640

641

642

643

644

645 **2. Figure 2**

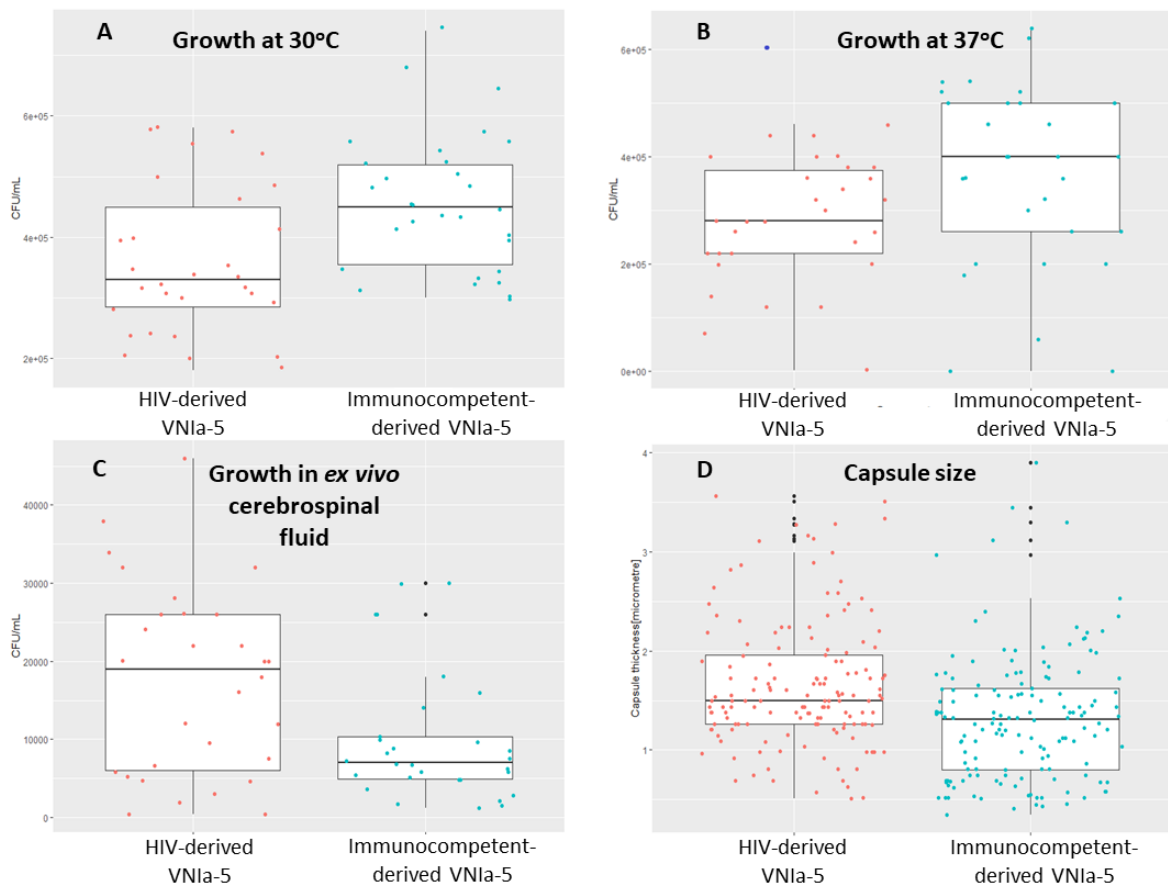

646

647 **Figure 2: Comparative growth rates of VN1a-5 isolates in YNB broth at 30°C (panel A), 37°C (Panel**  
648 **B) an in *ex vivo* cerebrospinal fluid (C), and differences in capsule size *in vitro* (D) according to**  
649 **source – HIV-infected patients or immunocompetent patients. There was statistically significant**  
650 **greater growth of isolates derived from immunocompetent patients at both temperatures (P=0.004**  
651 **and P=0.002 for 30°C and 37°C respectively). There was reduced growth at 37°C for both sets of**  
652 **isolates, but this was only statistically significant for those derived from HIV-infected patients. In**  
653 **contrast, isolates derived from immunocompetent patients appeared to have significantly impaired**  
654 **growth in *ex vivo* CSF compared with isolates from HIV-infected patients (P=0.02). (Note that the Y-**  
655 **axis scales are not the same in each panel). For all experiments N=15 isolates of each type, with 2**  
656 **biological replicates.**

657

658 **3. Figure 3**

659

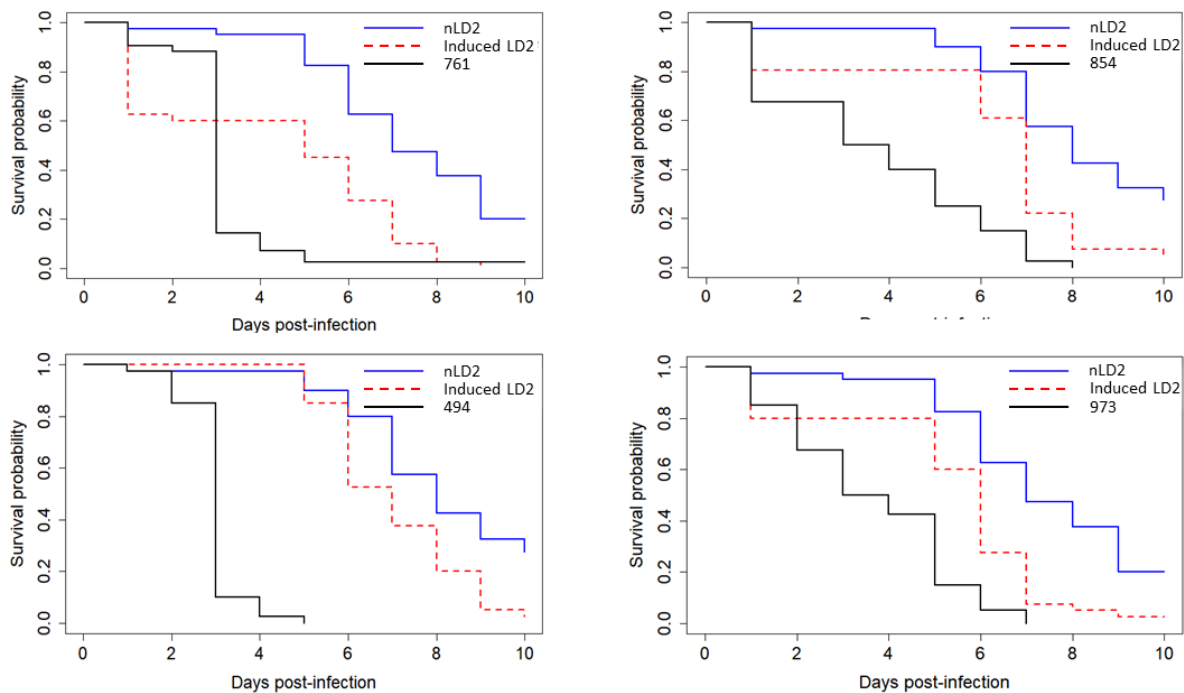

660

661

662 **Figure 3 : Survival curves for *G. mellonella* infected with 4 human isolates of *C. neoformans* lineage**  
663 **VNIa-5 derived from HIV-uninfected patients (BMD761, BMD854, BMD973 and BMD494), and**  
664 **naïve environmental strain (nLD2) and nLD2 following growth in sterile culture filtrate from each**  
665 **of the human derived isolates (induced LD2). Hazard ratios of the risk of death, 95%CI and P values**  
666 **for iLD2 versus nLD2 infections for each experiment are: HR 2.9, 95CI 1.8, 4.8 P<0.001; HR 2.5, 95CI**  
667 **1.5, 4.0 P<0.001; HR 2.7, 95CI 1.7, 4.4 P<0.001 and HR 2.2, 95CI 1.4,3.6 P=0.001 respectively.**

668

669 **4. Figure 4**

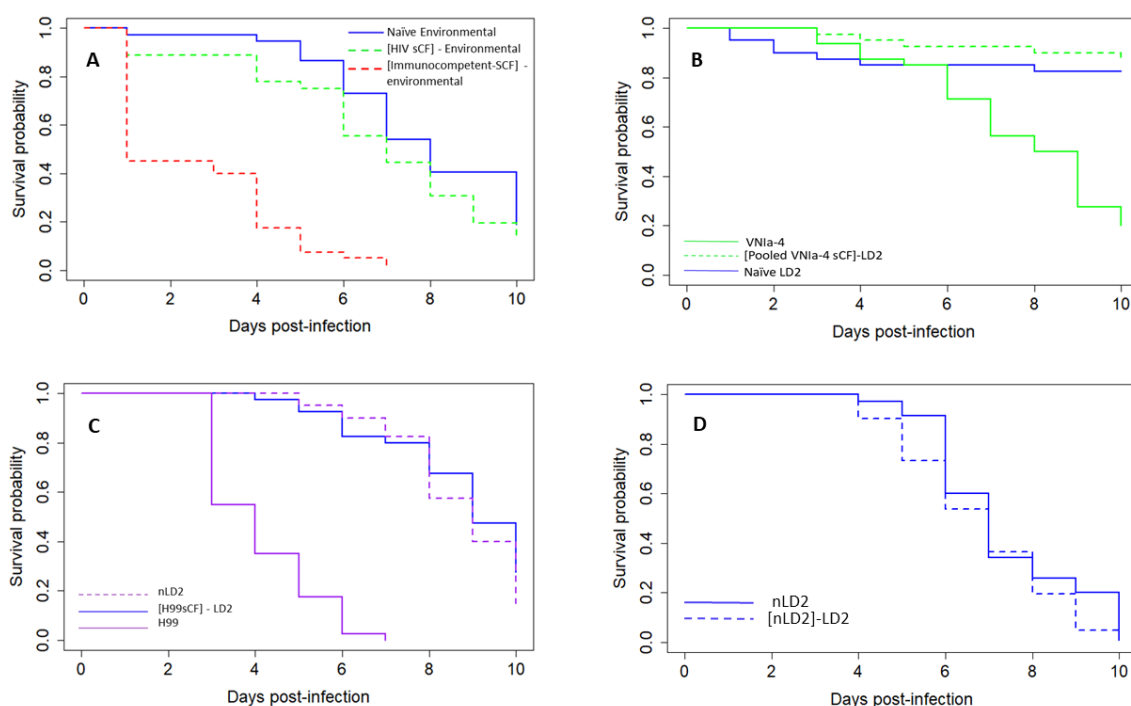

670 **Figure 4: Survival curves of *Galleria* infected with naïve environmental isolate, or that environmental isolate**  
 671 **following growth in media supplemented with sterile culture filtrate (sCF) of different sources, or the source**  
 672 **of sCF. The square brackets refer to the source of the sCF.**

673 **Figure 4A: Survival curves for *G. mellonella* infected with environmental isolates of *C. neoformans* lineage**  
 674 **VNIa-5 (naïve environmental, blue line), and infected with the same environmental isolates following their**  
 675 **growth in media supplemented with pooled sCF from either VNIa-5 lineage isolates derived from HIV-**  
 676 **infected patients ([HIV-sCF], green dashed line) or from immunocompetent patients ([Immunocompetent-**  
 677 **sCF], red dashed line). There is no significant increase in the hazard of death following infection with**  
 678 **environmental isolates grown with sCF from HIV associated VNIa-5 isolates (HR 1.4 (95CI 0.8-2.3), P=0.2).**  
 679 **Growth in media supplemented with sCF from isolates from immunocompetent patients is associated with a**  
 680 **significant increase in the hazard of death (HR 10.0; 95CI 5.6-17.9) P< 0.001 sCF-immunocompetent vs naïve.**

681 **Figure 4B: Growth of naïve environmental strain nLD2 in media supplemented with sCF from HIV derived**  
 682 **VNIa-4 lineage isolates does not result in increased virulence in the *Galleria* model. The naïve LD2 strain was**  
 683 **grown in media supplemented with pooled sCF from isolates BK80 or BK224 (VNIa-4 lineage strains derived**  
 684 **from the cerebrospinal fluid of HIV-infected patients). Infection with the LD2 environmental isolate grown in**  
 685 **sCF from isolates of the VNIa-4 lineage did not alter the hazard of death compared with infection with LD2 (HR**  
 686 **0.6; 95CI 0.2, 2.0, P=0.5).**

687 **Figure 4C: Growth of naïve environmental strain nLD2 in media supplemented with sCF from the**  
 688 ***Cryptococcus neoformans* H99 type strain does not result in increased virulence in the *Galleria* model. H99**  
 689 **was significantly more virulent than naïve DL2 (HR 28.7 (14-60.4) and P<0.001 for H99 vs LD2 ) but there was**  
 690 **no change in the hazard of death for *Galleria* between infection with either the naïve or H99 induced**  
 691 **environmental isolate HR 1.3 (0.8-2.2) and P=0.25 for iLD2 vs nLD2 N = 40 larvae per arm.**

692 **Figure 4D. The virulence of the LD2 environmental isolate is not increased by growth in media supplemented**  
 693 **with sCF derived from previous culture of its naïve state (HR 1.4, 95% CI 0.9-2.2, P=0.2).**



695 **5. Figure 5**

696

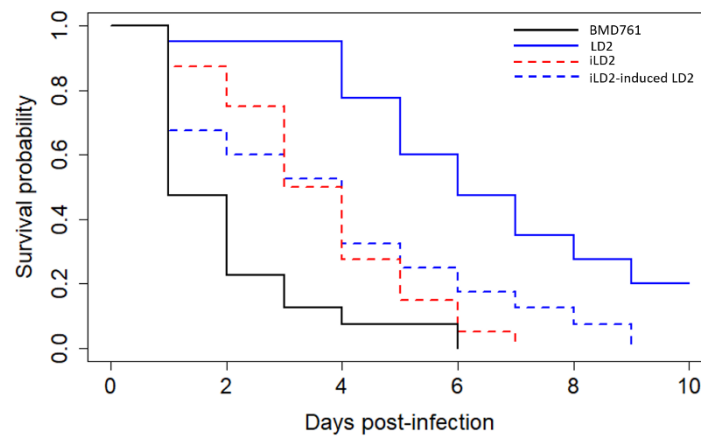

697

698

699 **Figure 5: Survival curves for *Galleria* infected with one of 4 VN1a-5 isolates: LD2: 'naïve'**

700 environmental isolate; BMD761: isolate from immunocompetent patient (HR 8.2 (4.9-13.8),  $P < 0.001$

701 vs LD2); induced LD2: naïve LD2 isolate that has been grown with sCF (sCF) from BMD761 (HR 3.6

702 (2.2-6.0),  $P < 0.001$  vs LD2); iLD2-induced LD2: naïve LD2 isolate grown with sCF from iLD2 (HR 2.8

703 (1.7-4.4),  $P < 0.001$  vs LD2). N=40 larvae per arm

704

705

706 **6. Figure 6**

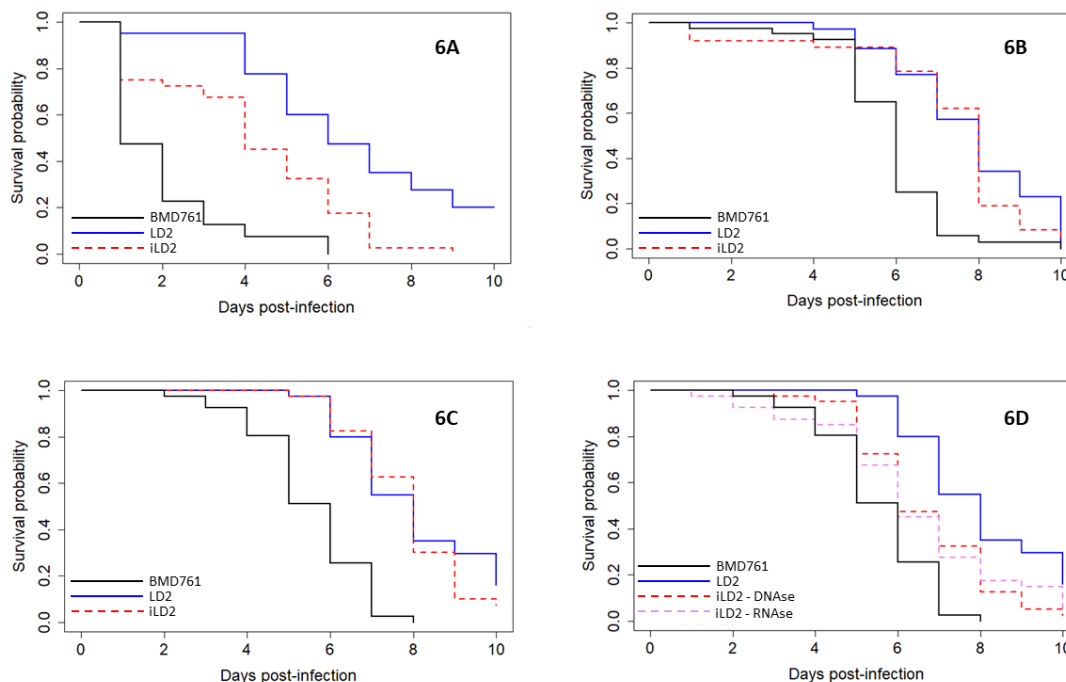

707 **Figure 6: The effects of treating sterile culture filtrate from highly virulent strain BMD761 with**  
 708 **either freezing, boiling, protease or nuclease on its ability to induce increased virulence in the**  
 709 **naïve environmental strain LD2.** Each figure shows survival curves for *Galleria* infected with  
 710 different *C. neoformans* isolates. BMD761 is the high virulence VN1a-5 lineage isolate derived from  
 711 an HIV-uninfected patient, LD2 is a low virulence VN1a-5 lineage isolate derived from the  
 712 environment, and induced LD2 is the naïve environmental LD2 isolate following growth in media  
 713 supplemented with sCF from BMD761.

714 **Figure 6A: The inducing effect of sCF is not affected by freezing at -20C.**

715 HR 2.7 95%CI 1.7, 4.5 P<0.001

716 **Figure 6B. Boiling abolishes the induction effect of sCF.**

717 HR1.3 95%CI 0.8, 2.01, P=0.3.

718 **Figure 6C: The inducing effect of sCF is abolished by treatment with proteinase.**

719 HR1.2, 95CI 0.8, 2.0, P=0.36

720 **Figure 6D. Treatment with DNase or RNase has no effect on the induction effect of sCF.** DNase HR  
 721 2.1, 95CI 1.3, 3.4, P=0.002; RNase HR 2.0, 95CI 1.2, 3.4, P=0.004.

722 N = 30 *Galleria* per arm for all experiments.

723

724 **7. Figure 7**

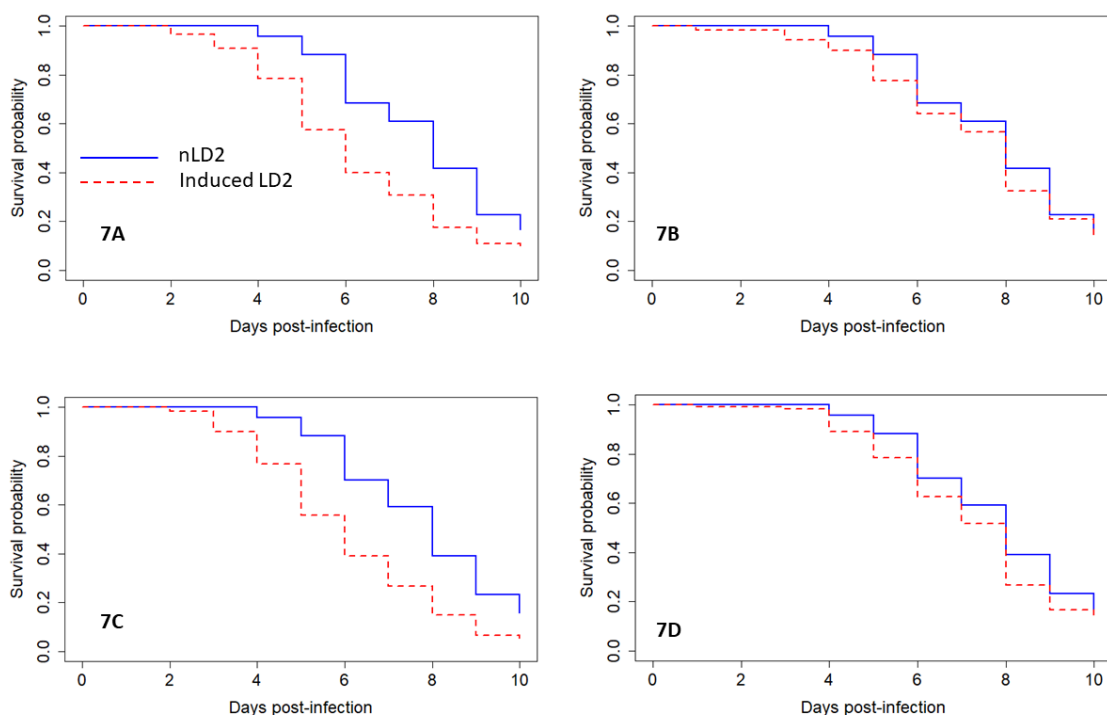

725 **Figure 7: The effect of ultracentrifugation of sterile culture filtrate on induction of virulence in naïve**  
726 **environmental isolate nLD2.**

727 SCF, derived either from highly virulent isolate BMD761, or from LD2 strain following virulence induction  
728 with sCF from BMD761, underwent an extracellular vesicle (EV) isolation protocol to produce a putatively EV  
729 containing pellet, and an EV-free supernatant. These fractions were then added to broth culture of naïve LD2  
730 isolate, and the relative virulence of naïve LD2 was compared with subsequent 'induced LD2' (iLD2).

731 Experiments were done in triplicate, N=80 *Galleria* per arm. Summated data shown.

732 **Figure 7A: Growth of LD2 in media supplemented with ultracentrifugation pellet derived from BMD761**  
733 **sCF.** Induction of increased virulence is seen, HR 1.8, 95CI 1.4, 2.4; P<0.001.

734 **Figure 7B: Growth of LD2 in media supplemented with ultracentrifugation supernatant derived from**  
735 **BMD761 sCF.** No induction of virulence in LD2 is seen, HR 1.2, 95CI 0.8, 1.5; P=0.3.

736 **Figure 7C: Growth of LD2 in media supplemented with ultracentrifugation pellet derived from sCF from**  
737 **LD2 that has previously been induced with BMD761 sCF.** Induction of increased virulence is seen, HR 2.1,  
738 95CI 1.6, 2.7; P<0.001.

739 **Figure 7D: Growth of LD2 in media supplemented with ultracentrifugation supernatant derived from sCF**  
740 **from LD2 that has previously been induced with BMD761.** No induction of increased virulence is seen, HR  
741 1.2, 95CI 0.9, 1.6; P=0.1.

742 In all panels the solid blue line represents *Galleria* infected with naïve LD2 (nLD2) and the red dashed line  
743 represents *Galleria* infected with the 'induced' LD2 (iLD2), i.e. the environmental isolate following growth in  
744 media supplemented with either pellet or supernatant.

745

746 **8. Figure 8**

747

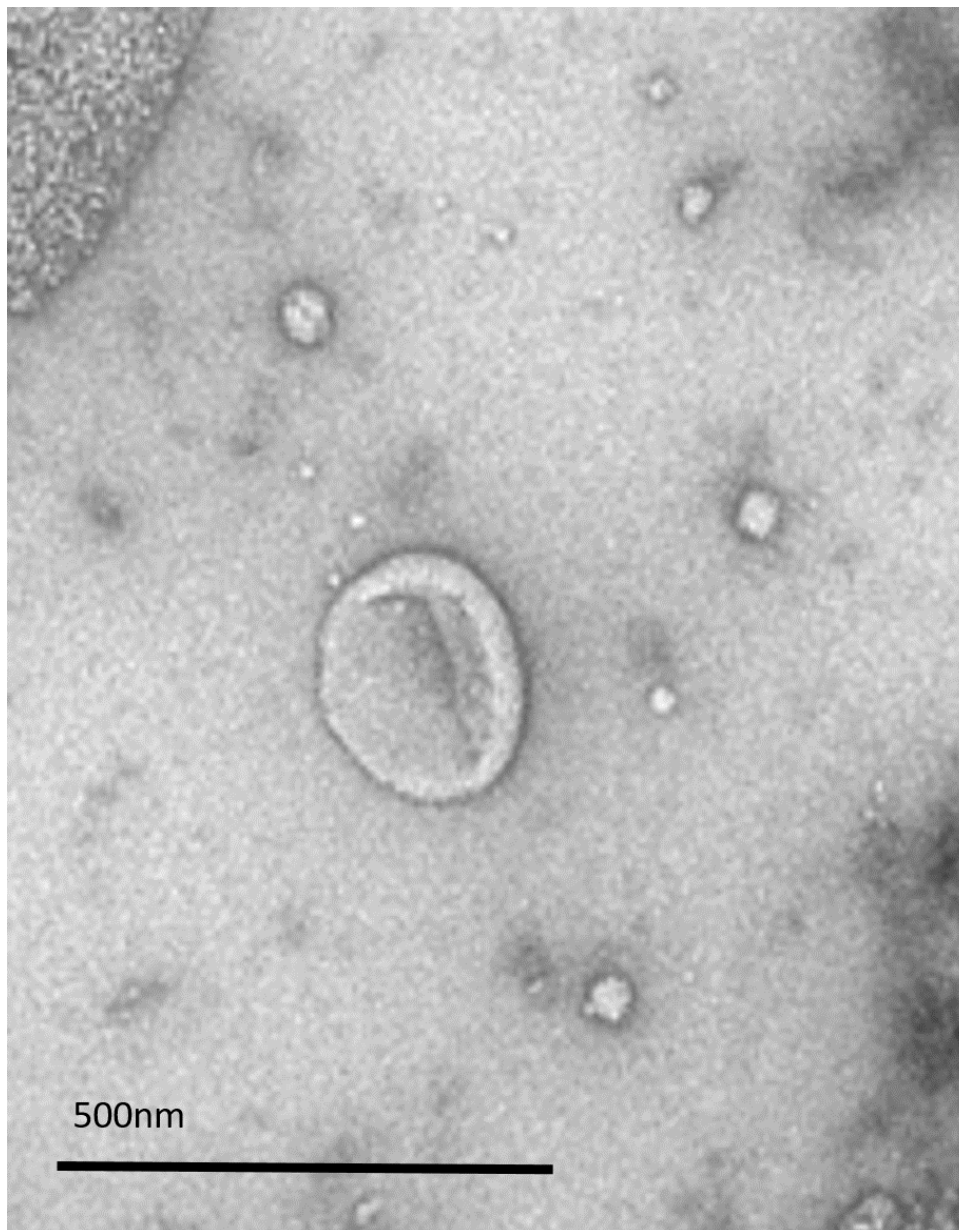

748

749

750

751 **Figure 8: Transmission electron micrograph showing example of extracellular vesicle in**  
752 **ultracentrifugation pellet of BMD761.**

753

754 **Figure 9**

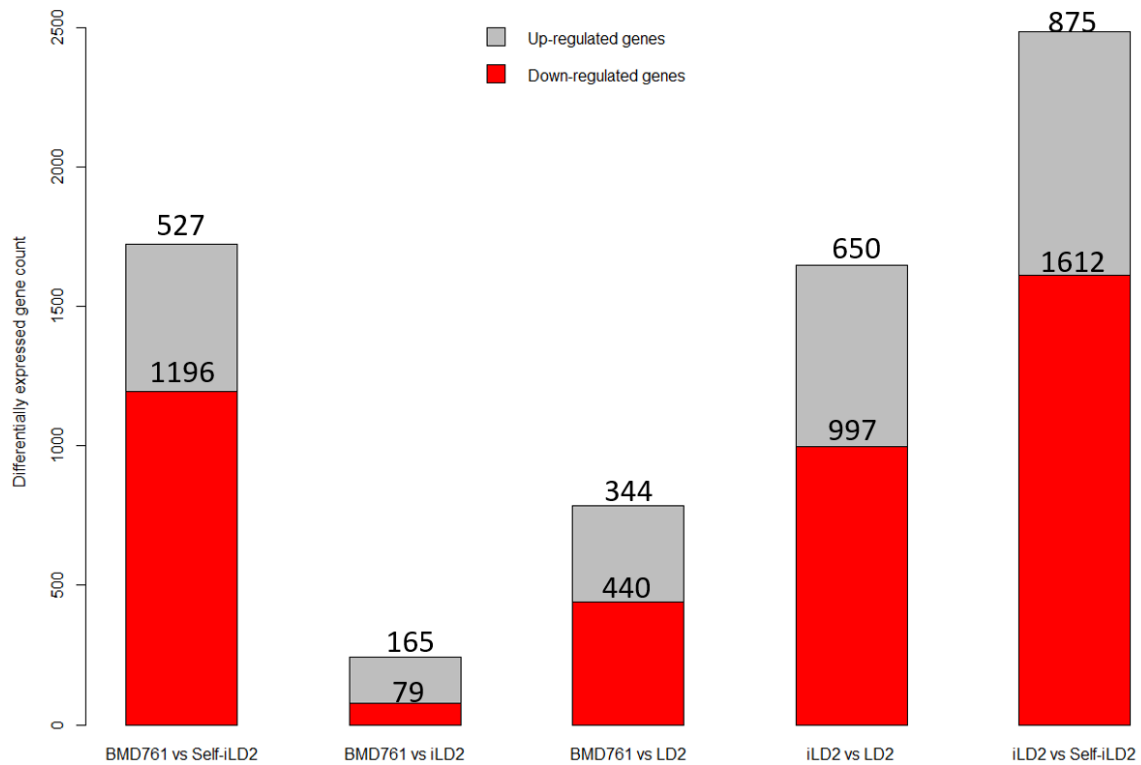

755

756 **Figure 9: The number of differentially expressed genes between different samples**  
757 **(outliers removed).** Genes were counted as differentially expressed if they had a  
758 Benjamani-Hochberg adjusted P-value of  $<0.05$ , and  $\log_2$  fold change  $\geq 1$  and  $\leq -1$ .

759

760

761

762       **References**

- 763    1.       Rajasingham R, Smith RM, Park BJ, Jarvis JN, Govender NP, Chiller TM, Denning DW,  
764       Loyse A, Boulware DR. Global burden of disease of HIV-associated cryptococcal  
765       meningitis: an updated analysis. *Lancet Infect Dis.* 2017;17(8):873-881.
- 766    2.       Ashton PM, Thanh LT, Trieu PH, Van Anh D, Trinh NM, Beardsley J, Kibengo F,  
767       Chierakul W, Dance DAB, Rattanaovong S, Davong V, Hung LQ, Chau NVV, Tung NLN,  
768       Chan AK, Thwaites GE, Laloo DG, Anscombe C, Nhat LTH, Perfect J, Dougan G, Baker  
769       S, Harris S, Day JN. Three phylogenetic groups have driven the recent population  
770       expansion of *Cryptococcus neoformans*. *Nat Commun.* 2019;10(1):2035.
- 771    3.       Day JN, Qihui S, Thanh LT, Trieu PH, Van AD, Thu NH, Chau TTH, Lan NPH, Chau NVV,  
772       Ashton PM, Thwaites GE, Boni MF, Wolbers M, Nagarajan N, Tan PBO, Baker S.  
773       Comparative genomics of *Cryptococcus neoformans* var. *grubii* associated with  
774       meningitis in HIV infected and uninfected patients in Vietnam. *PLoS Negl Trop Dis.*  
775       2017;11(6):e0005628.
- 776    4.       Thanh LT, Phan TH, Rattanaovong S, Nguyen TM, Duong AV, Dacon C, Hoang TN,  
777       Nguyen LPH, Tran CTH, Davong V, Nguyen CVV, Thwaites GE, Boni MF, Dance D,  
778       Ashton PM, Day JN. Multilocus sequence typing of *Cryptococcus neoformans* var.  
779       *grubii* from Laos in a regional and global context. *Med Mycol.* 2018.
- 780    5.       Chen J, Varma A, Diaz MR, Litvintseva AP, Wollenberg KK, Kwon-Chung KJ.  
781       *Cryptococcus neoformans* strains and infection in apparently immunocompetent  
782       patients, China. *Emerg Infect Dis.* 2008;14(5):755-762.

- 783 6. Chen YC, Chang SC, Shih CC, Hung CC, Luhbd KT, Pan YS, Hsieh WC. Clinical features  
784 and in vitro susceptibilities of two varieties of *Cryptococcus neoformans* in Taiwan.  
785 *Diagn Microbiol Infect Dis.* 2000;36(3):175-183.
- 786 7. Choi YH, Ngamskulrunroj P, Varma A, Sionov E, Hwang SM, Carriconde F, Meyer W,  
787 Litvintseva AP, Lee WG, Shin JH, Kim EC, Lee KW, Choi TY, Lee YS, Kwon-Chung KJ.  
788 Prevalence of the VN1c genotype of *Cryptococcus neoformans* in non-HIV-associated  
789 cryptococcosis in the Republic of Korea. *FEMS Yeast Res.* 2010;10(6):769-778.
- 790 8. Feng X, Yao Z, Ren D, Liao W, Wu J. Genotype and mating type analysis of  
791 *Cryptococcus neoformans* and *Cryptococcus gattii* isolates from China that mainly  
792 originated from non-HIV-infected patients. *FEMS Yeast Res.* 2008.
- 793 9. Chau TT, Mai NH, Phu NH, Nghia HD, Chuong LV, Sinh DX, Duong VA, Diep PT,  
794 Campbell JI, Baker S, Hien TT, Laloo DG, Farrar JJ, Day JN. A prospective descriptive  
795 study of cryptococcal meningitis in HIV uninfected patients in Vietnam - high  
796 prevalence of *Cryptococcus neoformans* var *grubii* in the absence of underlying  
797 disease. *BMC Infect Dis.* 2010;10:199.
- 798 10. Casadevall A, Perfect JR. *Cryptococcus neoformans*. 1 ed. Washington: American  
799 Society for Microbiology Press; 1998.
- 800 11. Bartlett KH, Kidd SE, Kronstad JW. The Emergence of *Cryptococcus gattii* in British  
801 Columbia and the Pacific Northwest. *Curr Infect Dis Rep.* 2008;10(1):58-65.
- 802 12. Day JN, Hoang TN, Duong AV, Hong CT, Diep PT, Campbell JI, Sieu TP, Hien TT, Bui T,  
803 Boni MF, Laloo DG, Carter D, Baker S, Farrar JJ. Most Cases of Cryptococcal  
804 Meningitis in HIV-Uninfected Patients in Vietnam Are Due to a Distinct Amplified  
805 Fragment Length Polymorphism-Defined Cluster of *Cryptococcus neoformans* var.  
806 *grubii* VN1. *J Clin Microbiol.* 2011;49(2):658-664.

- 807 13. Bielska E, Sisquella MA, Aldeieg M, Birch C, O'Donoghue EJ, May RC. Pathogen-  
808 derived extracellular vesicles mediate virulence in the fatal human pathogen  
809 *Cryptococcus gattii*. *Nat Commun*. 2018;9(1):1556.
- 810 14. Rodrigues ML, Nakayasu ES, Oliveira DL, Nimrichter L, Nosanchuk JD, Almeida IC,  
811 Casadevall A. Extracellular vesicles produced by *Cryptococcus neoformans* contain  
812 protein components associated with virulence. *Eukaryot Cell*. 2008;7(1):58-67.
- 813 15. Rodrigues ML, Nimrichter L, Oliveira DL, Frases S, Miranda K, Zaragoza O, Alvarez M,  
814 Nakouzi A, Feldmesser M, Casadevall A. Vesicular polysaccharide export in  
815 *Cryptococcus neoformans* is a eukaryotic solution to the problem of fungal trans-cell  
816 wall transport. *Eukaryot Cell*. 2007;6(1):48-59.
- 817 16. Wolf JM, Rivera J, Casadevall A. Serum albumin disrupts *Cryptococcus neoformans*  
818 and *Bacillus anthracis* extracellular vesicles. *Cell Microbiol*. 2012;14(5):762-773.
- 819 17. Sayers S, Li L, Ong E, Deng S, Fu G, Lin Y, Yang B, Zhang S, Fa Z, Zhao B, Xiang Z, Li Y,  
820 Zhao XM, Olszewski MA, Chen L, He Y. Victors: a web-based knowledge base of  
821 virulence factors in human and animal pathogens. *Nucleic Acids Res*.  
822 2019;47(D1):D693-D700.
- 823 18. Homer CM, Summers DK, Goranov AI, Clarke SC, Wiesner DL, Diedrich JK, Moresco JJ,  
824 Toffaletti D, Upadhy R, Caradonna I, Petnic S, Pessino V, Cuomo CA, Lodge JK,  
825 Perfect J, Yates JR, 3rd, Nielsen K, Craik CS, Madhani HD. Intracellular Action of a  
826 Secreted Peptide Required for Fungal Virulence. *Cell Host Microbe*. 2016;19(6):849-  
827 864.
- 828 19. Edskes HK, Khamar HJ, Winchester CL, Greenler AJ, Zhou A, McGlinchey RP,  
829 Gorkovskiy A, Wickner RB. Sporadic distribution of prion-forming ability of Sup35p  
830 from yeasts and fungi. *Genetics*. 2014;198(2):605-616.



- 831 20. Jurka J, Kapitonov VV, Pavlicek A, Klonowski P, Kohany O, Walichiewicz J. Repbase  
832 Update, a database of eukaryotic repetitive elements. *Cytogenet Genome Res.*  
833 2005;110(1-4):462-467.
- 834 21. Albuquerque PC, Nakayasu ES, Rodrigues ML, Frases S, Casadevall A, Zancoppe-  
835 Oliveira RM, Almeida IC, Nosanchuk JD. Vesicular transport in *Histoplasma*  
836 *capsulatum*: an effective mechanism for trans-cell wall transfer of proteins and lipids  
837 in ascomycetes. *Cell Microbiol.* 2008;10(8):1695-1710.
- 838 22. Rodrigues ML, Nimrichter L, Oliveira DL, Nosanchuk JD, Casadevall A. Vesicular Trans-  
839 Cell Wall Transport in Fungi: A Mechanism for the Delivery of Virulence-Associated  
840 Macromolecules? *Lipid Insights.* 2008;2:27-40.
- 841 23. Rodrigues ML, Casadevall A. A two-way road: novel roles for fungal extracellular  
842 vesicles. *Mol Microbiol.* 2018;110(1):11-15.
- 843 24. Ofir-Birin Y, Regev-Rudzki N. Extracellular vesicles in parasite survival. *Science.*  
844 2019;363(6429):817-818.
- 845 25. Konoshenko MY, Lekchnov EA, Vlassov AV, Laktionov PP. Isolation of Extracellular  
846 Vesicles: General Methodologies and Latest Trends. *Biomed Res Int.*  
847 2018;2018:8545347.
- 848 26. Casadevall A. Amoeba provide insight into the origin of virulence in pathogenic fungi.  
849 *Adv Exp Med Biol.* 2012;710:1-10.
- 850 27. Casadevall A, Fu MS, Guimaraes AJ, Albuquerque P. The 'Amoeboid Predator-Fungal  
851 Animal Virulence' Hypothesis. *J Fungi (Basel).* 2019;5(1).
- 852 28. Coelho C, Bocca AL, Casadevall A. The tools for virulence of *Cryptococcus*  
853 *neoformans*. *Adv Appl Microbiol.* 2014;87:1-41.

- 854 29. Derengowski Lda S, Paes HC, Albuquerque P, Tavares AH, Fernandes L, Silva-Pereira I,  
855 Casadevall A. The transcriptional response of *Cryptococcus neoformans* to ingestion  
856 by *Acanthamoeba castellanii* and macrophages provides insights into the  
857 evolutionary adaptation to the mammalian host. *Eukaryot Cell*. 2013;12(5):761-774.
- 858 30. Perfect JR, Dismukes WE, Dromer F, Goldman DL, Graybill JR, Hamill RJ, Harrison TS,  
859 Larsen RA, Lortholary O, Nguyen MH, Pappas PG, Powderly WG, Singh N, Sobel JD,  
860 Sorrell TC. Clinical Practice Guidelines for the Management of Cryptococcal Disease:  
861 2010 Update by the Infectious Diseases Society of America. *Clin Infect Dis*.  
862 2010;50(3):291-322.
- 863 31. Chen Y, Toffaletti DL, Tenor JL, Litvintseva AP, Fang C, Mitchell TG, McDonald TR,  
864 Nielsen K, Boulware DR, Bicanic T, Perfect JR. The *Cryptococcus neoformans*  
865 transcriptome at the site of human meningitis. *mBio*. 2014;5(1):e01087-01013.
- 866 32. Blackburn SL, Grande AW, Swisher CB, Hauck EF, Jagadeesan B, Provencio JJ.  
867 Prospective Trial of Cerebrospinal Fluid Filtration After Aneurysmal Subarachnoid  
868 Hemorrhage via Lumbar Catheter (PILLAR). *Stroke*. 2019;50(9):2558-2561.
- 869 33. Blackburn SL, Swisher CB, Grande AW, Rubi A, Verbick LZ, McCabe A, Lad SP. Novel  
870 Dual Lumen Catheter and Filtration Device for Removal of Subarachnoid  
871 hemorrhage: First Case Report. *Oper Neurosurg (Hagerstown)*. 2019;16(5):E148-  
872 E153.
- 873 34. Smilnak GJ, Charalambous LT, Cutshaw D, Premji AM, Giamberardino CD, Ballard CG,  
874 Bartuska AP, Ejikeme TU, Sheng H, Verbick LZ, Hedstrom BA, Pagadala PC, McCabe  
875 AR, Perfect JR, Lad SP. Novel Treatment of Cryptococcal Meningitis via  
876 Neurapheresis Therapy. *J Infect Dis*. 2018;218(7):1147-1154.

- 877 35. Beardsley J, Wolbers M, Kibengo FM, Ggayi AB, Kamali A, Cuc NT, Binh TQ, Chau NV,  
878 Farrar J, Merson L, Phuong L, Thwaites G, Van Kinh N, Thuy PT, Chierakul W, Siriboon  
879 S, Thiansukhon E, Onsanit S, Supphamongkholchaikul W, Chan AK, Heyderman R,  
880 Mwinjiwa E, van Oosterhout JJ, Imran D, Basri H, Mayxay M, Dance D, Phimmason  
881 P, Rattanaovong S, Laloo DG, Day JN, CryptoDex I. Adjunctive Dexamethasone in HIV-  
882 Associated Cryptococcal Meningitis. *N Engl J Med*. 2016;374(6):542-554.
- 883 36. Day JN, Chau TT, Wolbers M, Mai PP, Dung NT, Mai NH, Phu NH, Nghia HD, Phong  
884 ND, Thai CQ, Thai le H, Chuong LV, Sinh DX, Duong VA, Hoang TN, Diep PT, Campbell  
885 JI, Sieu TP, Baker SG, Chau NV, Hien TT, Laloo DG, Farrar JJ. Combination antifungal  
886 therapy for cryptococcal meningitis. *N Engl J Med*. 2013;368(14):1291-1302.
- 887 37. Lee A, Toffaletti DL, Tenor J, Soderblom EJ, Thompson JW, Moseley MA, Price M,  
888 Perfect JR. Survival defects of *Cryptococcus neoformans* mutants exposed to human  
889 cerebrospinal fluid result in attenuated virulence in an experimental model of  
890 meningitis. *Infect Immun*. 2010;78(10):4213-4225.
- 891 38. Zaragoza O, Casadevall A. Experimental modulation of capsule size in *Cryptococcus*  
892 *neoformans*. *Biol Proced Online*. 2004;6:10-15.
- 893 39. Sibiiti W, Robertson E, Beale MA, Johnston SA, Brouwer AE, Loyse A, Jarvis JN,  
894 Gilbert AS, Fisher MC, Harrison TS, May RC, Bicanic T. Efficient phagocytosis and  
895 laccase activity affect the outcome of HIV-associated cryptococcosis. *J Clin Invest*.  
896 2014;124(5):2000-2008.
- 897 40. Chen SC, Muller M, Zhou JZ, Wright LC, Sorrell TC. Phospholipase activity in  
898 *Cryptococcus neoformans*: a new virulence factor? *J Infect Dis*. 1997;175(2):414-420.
- 899 41. Liao Y, Smyth GK, Shi W. featureCounts: an efficient general purpose program for  
900 assigning sequence reads to genomic features. *Bioinformatics*. 2014;30(7):923-930.

- 901 42. Love MI, Huber W, Anders S. Moderated estimation of fold change and dispersion  
902 for RNA-seq data with DESeq2. *Genome Biol.* 2014;15(12):550.
- 903 43. Love MI, Anders S, Kim V, Huber W. RNA-Seq workflow: gene-level exploratory  
904 analysis and differential expression. *F1000Res.* 2015;4:1070.
- 905 44. R Core Team. R: A language and environment for statistical computing. 2018;  
906 <http://www.R-project.org>. Accessed 01 January 2020.
- 907 45. Kassambara A, Kosinskis M, Przemyslaw B, Scheipl F. *survminer: Survival Analysis and*  
908 *Visualization*. 2016. <https://rpkgs.datanovia.com/survminer/index.html>
- 909 46. Wickham H. *ggplot2: Elegant Graphics for Data Analysis.*: Springer-Verlag New York.;  
910 2009.

911

912

913 **Supporting Information**

914

915 **Tables**

916 **1. Table S1: Details of strains used**

917

| Strain Number | Source                                                           | Genomic Lineage | Figure       |        |
|---------------|------------------------------------------------------------------|-----------------|--------------|--------|
| BK02          | HIV patients with cryptococcal meningitis                        | VN1a-4          | 1A           |        |
| BK111         |                                                                  |                 |              |        |
| BK120         |                                                                  |                 |              |        |
| BK14          |                                                                  |                 |              |        |
| BK151         |                                                                  |                 |              |        |
| BK156         |                                                                  |                 |              |        |
| BK182         |                                                                  |                 |              |        |
| BK193         |                                                                  |                 |              |        |
| BK224         |                                                                  |                 |              | 1A, 4B |
| BK30          |                                                                  |                 |              | 1A     |
| BK35          |                                                                  |                 |              |        |
| BK48          |                                                                  |                 |              |        |
| BK56          |                                                                  |                 |              |        |
| BK57          |                                                                  |                 |              |        |
| BK59          |                                                                  |                 |              |        |
| BK73          |                                                                  |                 |              |        |
| BK74          |                                                                  |                 |              |        |
| BK89          |                                                                  |                 |              |        |
| BK90          |                                                                  |                 |              |        |
| BK225         |                                                                  |                 | 4B           |        |
| BK80          |                                                                  |                 |              |        |
| BMD101        | Apparently immunocompetent patients with cryptococcal meningitis | VN1a-5          | 1A           |        |
| BMD1198       |                                                                  |                 | 2            |        |
| BMD1228       |                                                                  |                 | 1A           |        |
| BMD1232       |                                                                  |                 | 2            |        |
| BMD1291       |                                                                  |                 |              |        |
| BMD1353       |                                                                  |                 | 1A           |        |
| BMD1452       |                                                                  |                 |              |        |
| BMD1646       |                                                                  |                 | 1A, 2        |        |
| BMD1716       |                                                                  |                 |              |        |
| BMD1828       |                                                                  |                 | 2, 3, 4A     |        |
| BMD367        |                                                                  |                 |              |        |
| BMD394        |                                                                  |                 | 2            |        |
| BMD494        |                                                                  |                 |              |        |
| BMD1592       |                                                                  |                 | 1A           |        |
| BMD700        |                                                                  |                 |              |        |
| BMD534        |                                                                  |                 | 1-3, 4A, 5-8 |        |
| BMD761        |                                                                  |                 |              |        |
| BMD854        |                                                                  |                 | 1-3, 4A      |        |
| BMD973        |                                                                  |                 |              |        |
| BMD865        |                                                                  |                 | 2, 3, 4A     |        |
| BK42          |                                                                  |                 |              |        |
| BK139         |                                                                  |                 | 1B, 2, 4A    |        |
| LD2 (nLD2)    |                                                                  |                 |              |        |
| NT7533        |                                                                  |                 | 1B, 3-7      |        |
| BK031         |                                                                  |                 |              |        |
| BK037         | 1B, 4A                                                           |                 |              |        |
| BK039         |                                                                  |                 |              |        |

|                  |                                                                                                                                             |         |                    |
|------------------|---------------------------------------------------------------------------------------------------------------------------------------------|---------|--------------------|
| BK044            | HIV patients with cryptococcal meningitis                                                                                                   |         | 2                  |
| BK047            |                                                                                                                                             |         |                    |
| BK062            |                                                                                                                                             |         |                    |
| BK063            |                                                                                                                                             |         |                    |
| BK142            |                                                                                                                                             |         |                    |
| BK185            |                                                                                                                                             |         |                    |
| BK196            |                                                                                                                                             |         |                    |
| BK251            |                                                                                                                                             |         |                    |
| BK255            |                                                                                                                                             |         |                    |
| BK257            |                                                                                                                                             |         |                    |
| Induced LD2      | Naive environmental LD2 induced by grown in culture filtrate of one of clinical isolates (BMD761, BMD854, BMD494, BMD973, BK80, BK224, H99) |         | 3, 5, 6 (A,B,C), 7 |
| H99              | Clinical reference strain                                                                                                                   | unknown | 4C                 |
| [nLD2]-LD2       | Naive environmental LD2 induced by grown in its own culture filtrate                                                                        | VNIa-5  | 4D                 |
| iLD2-Induced LD2 | Naive environmental LD2 induced by culture filtrate of Induced LD2                                                                          |         | 5                  |
| iLD2-DNAse       | Naive environmental LD2 induced by culture filtrate of BMD761 treated with DNAse                                                            |         | 6D                 |
| iLD2-RNAse       | Naive environmental LD2 induced by culture filtrate of BMD761 treated with RNAse                                                            |         |                    |

918

919

920  
921  
922

## 2. Supplementary Table S2

| Experimental condition | Total reads | Mapping (%) | Unique mapping (%) |
|------------------------|-------------|-------------|--------------------|
| BMD761-1               | 10566932    | 99.07       | 96.56              |
| BMD761-2               | 10209953    | 99.22       | 94.11              |
| BMD761-3               | 8026923     | 99.16       | 96.47              |
| BMD761-4               | 8389000     | 99.02       | 96.63              |
| BMD761-5               | 7992309     | 99.07       | 96.82              |
| BMD761-6               | 10283111    | 99.08       | 96.75              |
| LD2-1                  | 9483009     | 99.01       | 96.63              |
| LD2-2                  | 11023417    | 99.13       | 96.81              |
| LD2-3                  | 10871841    | 98.94       | 96.49              |
| LD2-4                  | 9038152     | 97.23       | 94.84              |
| LD2-5                  | 11368845    | 99.07       | 96.60              |
| LD2-6                  | 6879322     | 99.11       | 96.90              |
| Induced LD2-1          | 10297952    | 99.17       | 96.96              |
| Induced LD2-2          | 8650109     | 99.19       | 96.76              |
| Induced LD2-3          | 9502629     | 99.19       | 96.33              |
| Induced LD2-4          | 10857524    | 99.06       | 96.67              |
| Induced LD2-5          | 10559163    | 99.20       | 97.13              |
| Induced LD2-6          | 10979132    | 99.24       | 95.95              |
| Self-induced LD2-1     | 8345534     | 98.94       | 96.18              |
| Self-induced LD2-2     | 7389997     | 99.31       | 96.73              |
| Self-induced LD2-3     | 6901251     | 99.22       | 96.54              |
| Self-induced LD2-4     | 8314394     | 99.27       | 96.51              |
| Self-induced LD2-5     | 9311518     | 99.00       | 96.10              |
| Self-induced LD2-6     | 12251864    | 99.22       | 96.42              |

923  
924  
925  
926  
927  
928  
929  
930

**Supplementary Table S2** Mapping statistics for *C. neoformans* var. *grubii* RNA-seq data. Each isolate was performed in six biological replicates. Total reads: number of short read generated; Mapping: percentage of reads mapped to *C. neoformans* var. *grubii* H99 reference genome. Unique mapping: percentage of reads uniquely mapped to genomic features in the reference genome.

931 **3. Supplementary Table S3**

932

933

| GeneID     | Product Description                                                | Name   | log2FoldChange |
|------------|--------------------------------------------------------------------|--------|----------------|
| CNAG_05472 | Meiotic recombination protein                                      | SPO11  | -2.1           |
| CNAG_06574 | Secreted antiphagocytic protein                                    | APP1   | -2.1           |
| CNAG_05015 | Catalase 4                                                         | CAT4   | -1.7           |
| CNAG_03012 | Quorum sensing protein 1                                           | QSP1   | -1.3           |
| CNAG_04217 | Phosphoenolpyruvate carboxylase (ATP)                              | PCK1   | -1.3           |
| CNAG_05181 | White-collar transcription factor; blue light photoresponsive gene | BWC1   | -1.0           |
| CNAG_06500 | Arginine metabolism transcriptional control protein                | ARG1   | 1.0            |
| CNAG_02885 | Capsule-associated protein                                         | CAP64  | 1.1            |
| CNAG_02729 | Hypothetical protein                                               | FRR1   | 1.2            |
| CNAG_03263 | Translation elongation factor Tu                                   | TUF1   | 1.2            |
| CNAG_02531 | Mitogen activated protein kinase                                   | CPK2   | 1.2            |
| CNAG_05998 | Rho-GTPase                                                         | RAC2   | 1.4            |
| CNAG_01172 | Parallel beta-helix repeat protein                                 | PBX1   | 1.5            |
| CNAG_05274 | STE/STE20/YSK protein kinase                                       | null   | 1.6            |
| CNAG_00418 | S-adenosylmethionine synthase                                      | ILV2   | 1.6            |
| CNAG_02036 | Putative sugar transporter                                         | CAS4   | 1.7            |
| CNAG_01890 | Methionine synthase                                                | MET6   | 1.7            |
| CNAG_05968 | Rho-like GTPase                                                    | CDC420 | 1.7            |
| CNAG_06231 | Large subunit ribosomal protein L13                                | null   | 2.1            |
| CNAG_00779 | Large subunit ribosomal protein L27e                               | RPL27  | 2.4            |
| CNAG_06487 | Putative chitin synthase                                           | CHS6   | 4.6            |
| CNAG_01907 | PLK/PLK1 protein kinase                                            | null   | 5.3            |
| CNAG_05565 | Hypothetical protein                                               | null   | 5.7            |

934

935

936

937

938

**Table S3:** Regulation of virulence-associated genes in BMD761 and Induced LD2 strains relative to naive LD2. Null means there is no function described or no ortholog for the gene in question.



939

940 **Supplementary Figures**

941 **1. Figure S1: The virulence phenotype of environmental VN1a-5 isolate is stable over**  
942 **multiple infection passages (6-fold) through *Galleria* (P = 0.92, log rank test)**

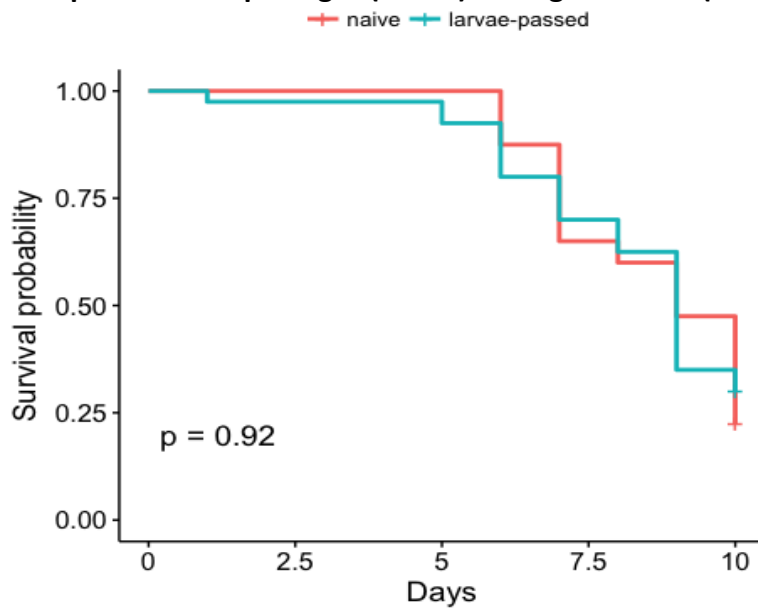

943  
944

945  
946  
947  
948

## 2. Supplementary Figure S2: The induced increased virulence phenotype is stable over multiple generations.

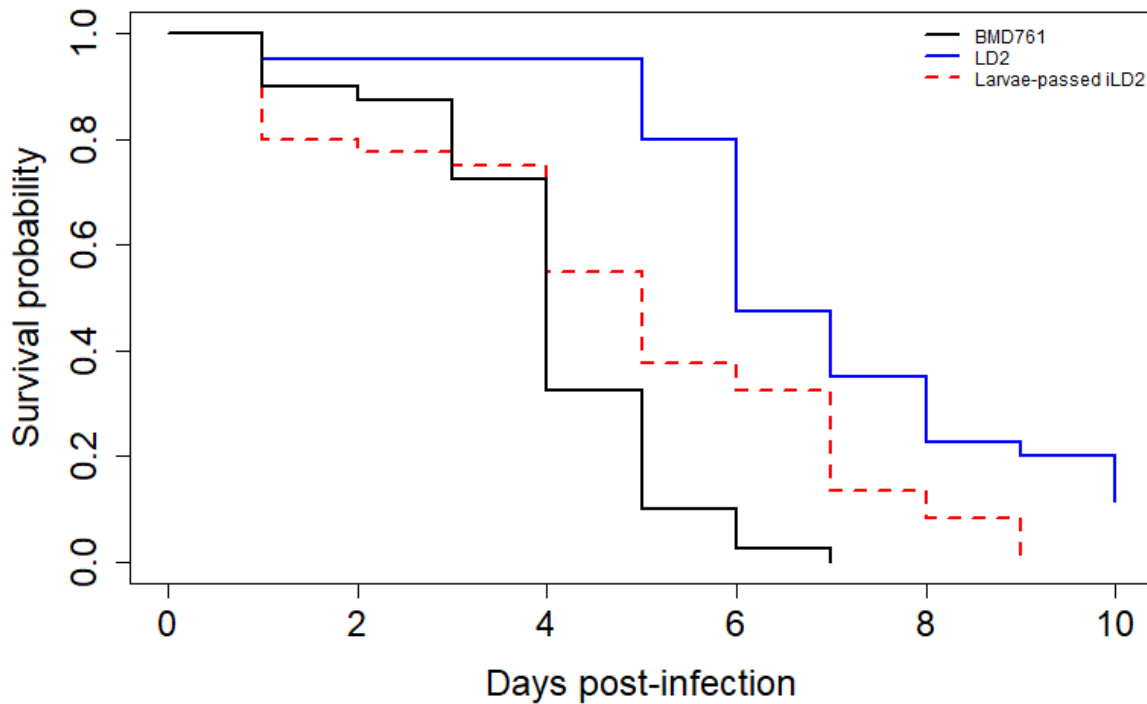

949  
950  
951  
952  
953  
954  
955  
956  
957

**Figure S2 shows survival curves for Galleria infected with one of 3 isolates:** The black curve is for Galleria infected with the hypervirulent immunocompetent patient derived BMD761 isolates, the blue curve for the naïve LD2 environmental isolate, and the red curve for infection with previously induced LD2 that has been repeatedly passaged through Galleria following recovery from haemolymph. The induced LD2 retains increased virulence compared with its naïve self. HR induced LD2 versus naïve LD2: HR2.3; 95CI 1.4, 3.7, P=0.001.

958 **3. Supplementary Figure S3: changes in *in vitro* virulence phenotypes following**  
959 **induction of nLD2**

960 **a. Figure S3a: fungal burden ex vivo CSF 761 vs iLD2 versus nLD2**  
961

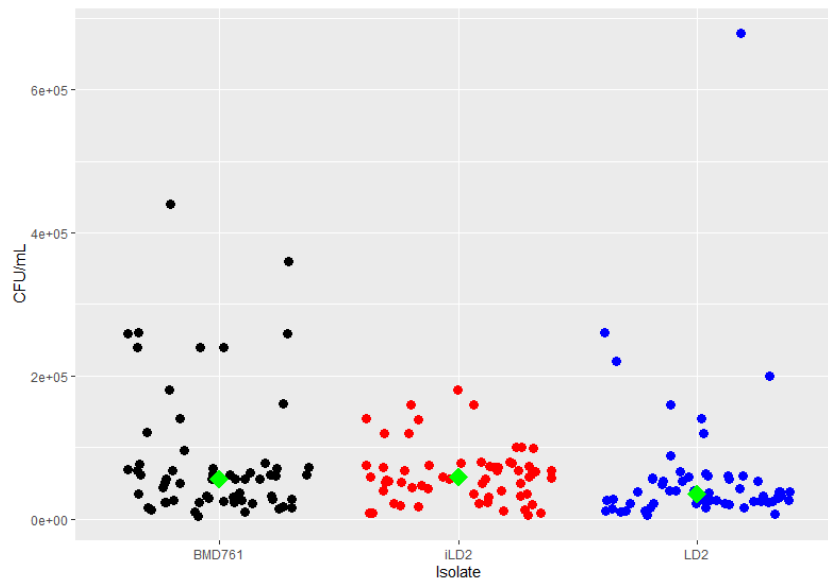

962 **Figure S3a:** Induced LD2 has superior growth in *ex vivo* CSF compared with its naïve self,  
963 with higher fungal burdens after 48 hours incubation (median  $5.9 \times 10^4$  CFU/ml, IQR  $3.6 \times 10^4$   
964  $- 7.6 \times 10^4$  vs  $3.5 \times 10^4$  CFU/ml, IQR  $2.3 - 5.7 \times 10^4$ ,  $P = 0.02$ )  
965  
966

**b. Figure S3b: Fungal burden recovered from Galleria**

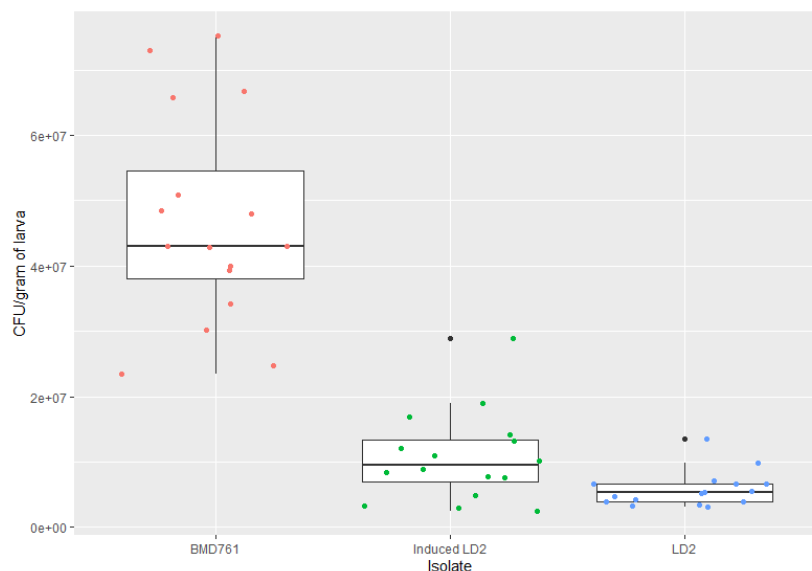

967 **Figure S3b:** The 48 hour fungal burden in *Galleria* hemolymph infected with induced isolate  
968 is significantly higher than that of its naïve self (median fungal burden  $9.6 \times 10^6$  CFU/g body  
969 weight (inter-quartile range  $6.9 \times 10^6 - 1.4 \times 10^7$ ) versus  $5.3 \times 10^6$  CFU/g body weight (IQR  $4.0$   
970  $\times 10^6 - 6.7 \times 10^6$ ,  $P = 0.025$ ),  
971  
972  
973  
974

975  
976  
977

#### 4. Supplementary Figure S4 :Capsule size of induced LD2 compared with naïve LD2

##### a. Capsule grown *in vitro*

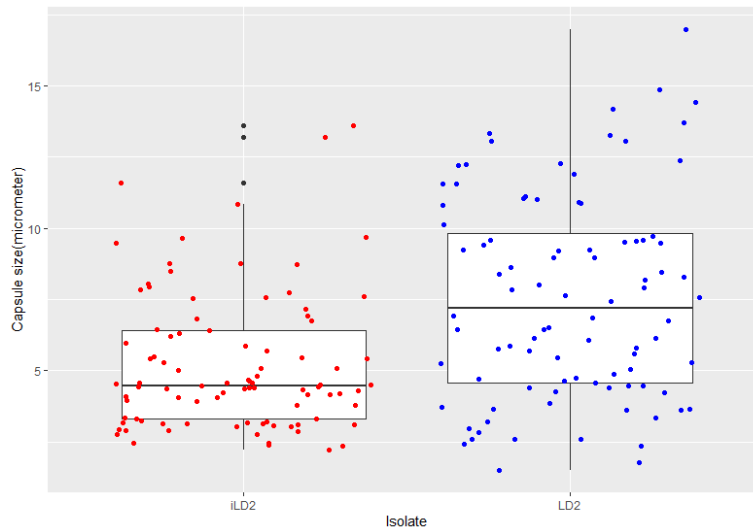

978 Induced LD2 isolates expressed significantly thinner capsules compared with the naïve self  
979 both when grown *in vitro* (median capsule width 4.5  $\mu\text{m}$ , IQR 3.3-6.4 versus 7.2  $\mu\text{m}$ , IQR 4.5  
980 – 9.8,  $P < 0.001$ )  
981

##### b. Capsule size ex-Galleria

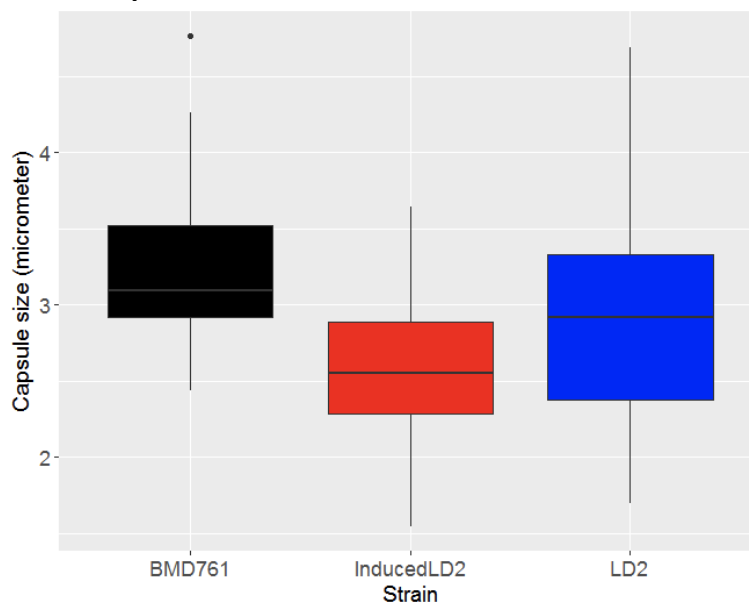

982 Capsular size comparison of *C. neoformans* (clinical BMD761, environmental LD2 and Induced  
983 LD2) recovered from larval hemolymph 48 hours post-inoculation. Adjusted P value = 0.03  
984 obtained from Kruskal-Wallis test with Benjamini-Hochberg method (Induced LD2 vs LD2)  
985  
986

987 **5. Supplementary Figure S5: effect of bovine serum albumin on induction of**  
988 **environmental isolate LD2 by hypervirulent isolate BMD761**  
989

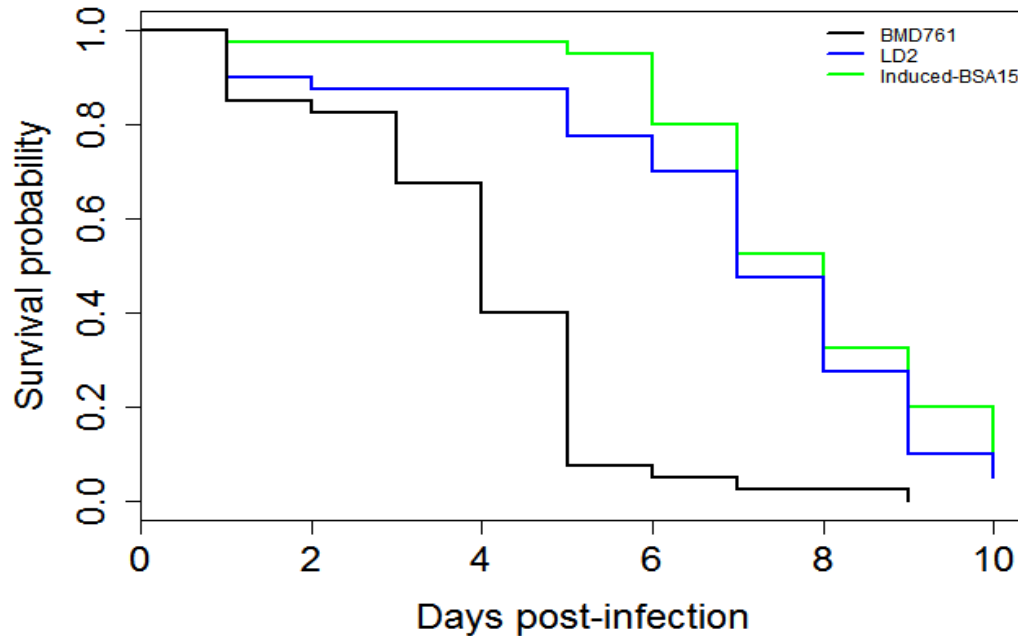

990  
991 *Galleria* infection experiment following induction of naïve environmental isolate LD2 in  
992 sterile culture filtrate derived from hypervirulent VN1a-5 isolate BMD761, but following  
993 addition of bovine serum albumin. The resulting isolate is termed Induced-BSA15. Survival  
994 curves are for the infection of *Galleria* with the naïve environmental isolate LD2 (blue),  
995 Induced-BSA15, and BMD761. No induction of virulence is seen when BSA is added to sCF  
996 (Hazard ratio for induced-BSA15 versus LD2: HR 0.8; 95CI 0.5, 1.3, P=0.32  
997

998  
999  
1000  
1001  
1002  
1003  
1004

**6. Supplementary Figure S6: Principle components analysis of 6 biological replicates of four conditions:** naïve environmental LD2, BMD761 from an HIV uninfected patient, induced LD2 cultured in the presence of supernatant from LD2, and LD2 'self-induced' i.e. grown in the presence of supernatant from a different culture of LD2.

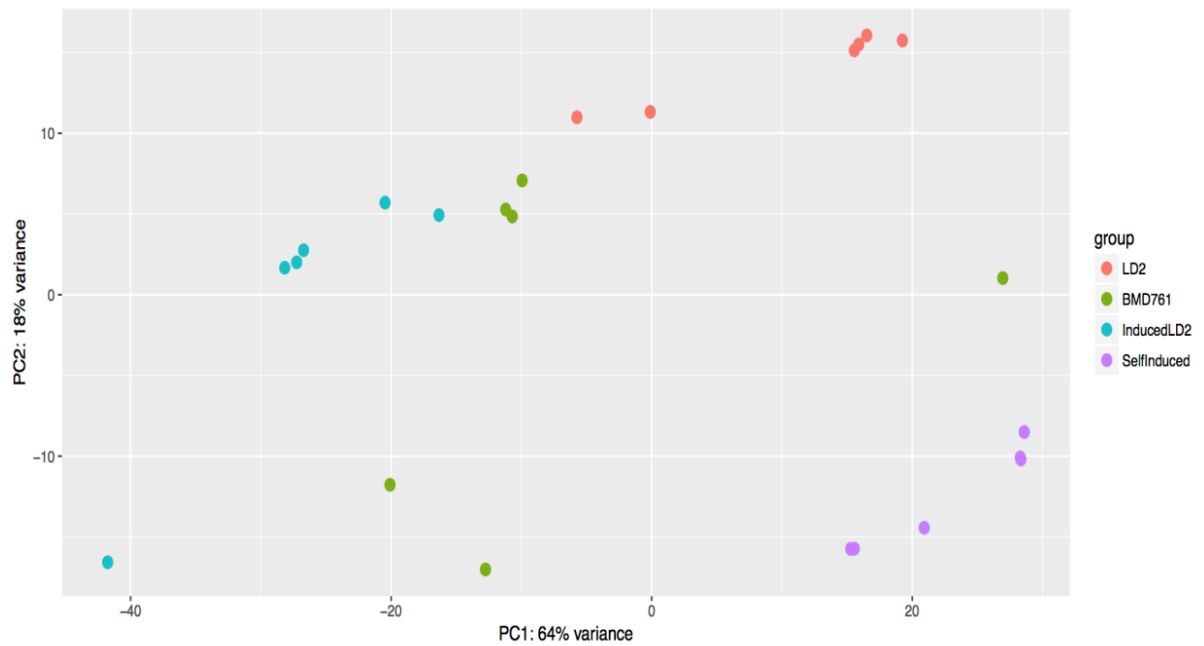

1005

1006 **7. Supplementary Figure S7: The number of differentially expressed genes between**  
1007 **different samples (outliers included).** Genes were counted as differentially  
1008 expressed if they had a Benjamani-Hochberg adjusted P-value of  $<0.05$ , and log2 fold  
1009 change  $\geq 1$  and  $\leq -1$ .

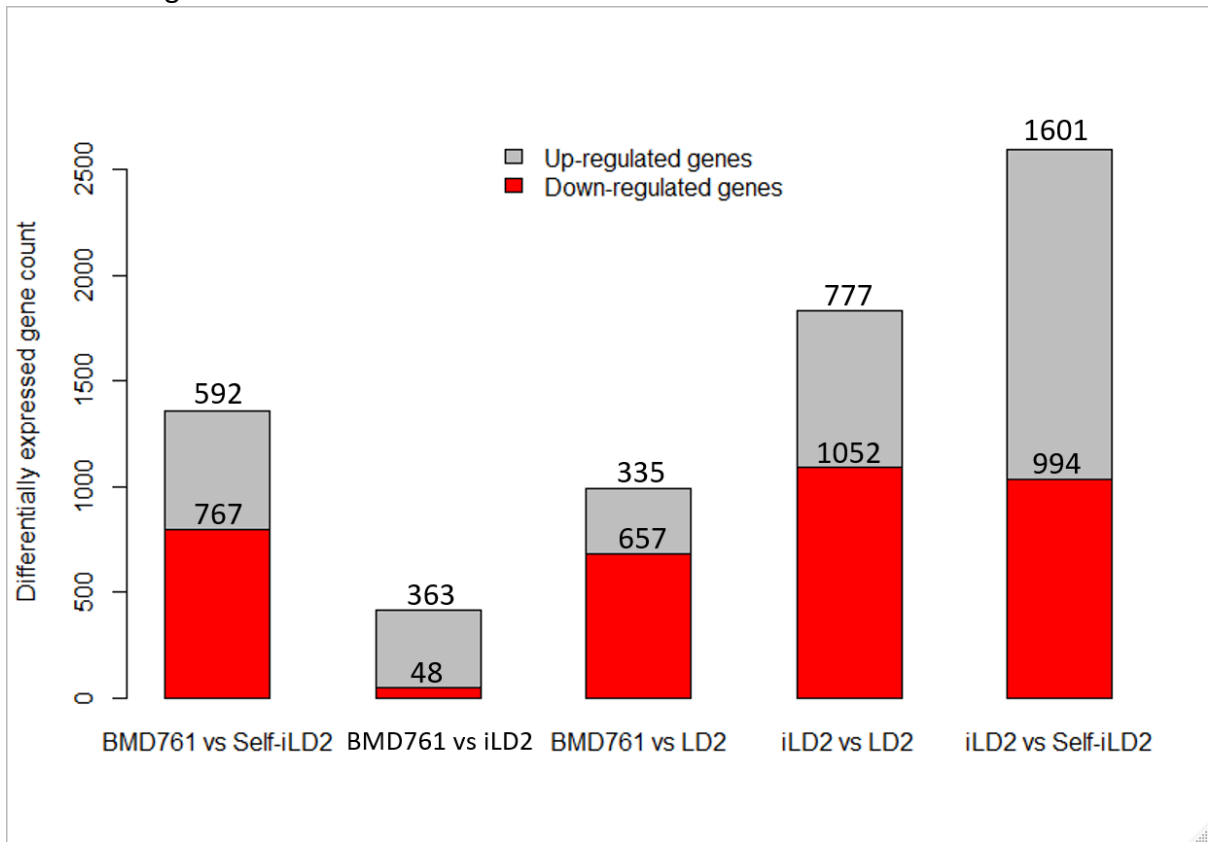

1010

1011
